# Supplementary material for: Digital Holographic Microscopy for Label-Free Detection of Leukocyte Alternations Associated with Perioperative Inflammation after Cardiac Surgery
Source: MDPI journal article supplement (doi:10.3390/cells11040755), 2022-02-21

# Supplementary Figure S7

P values presented in form of a heat map. Bivariate correlations between changes of DHM data, flow cytometric parameters and epinephrine dose between timepoints PreOP and d1.

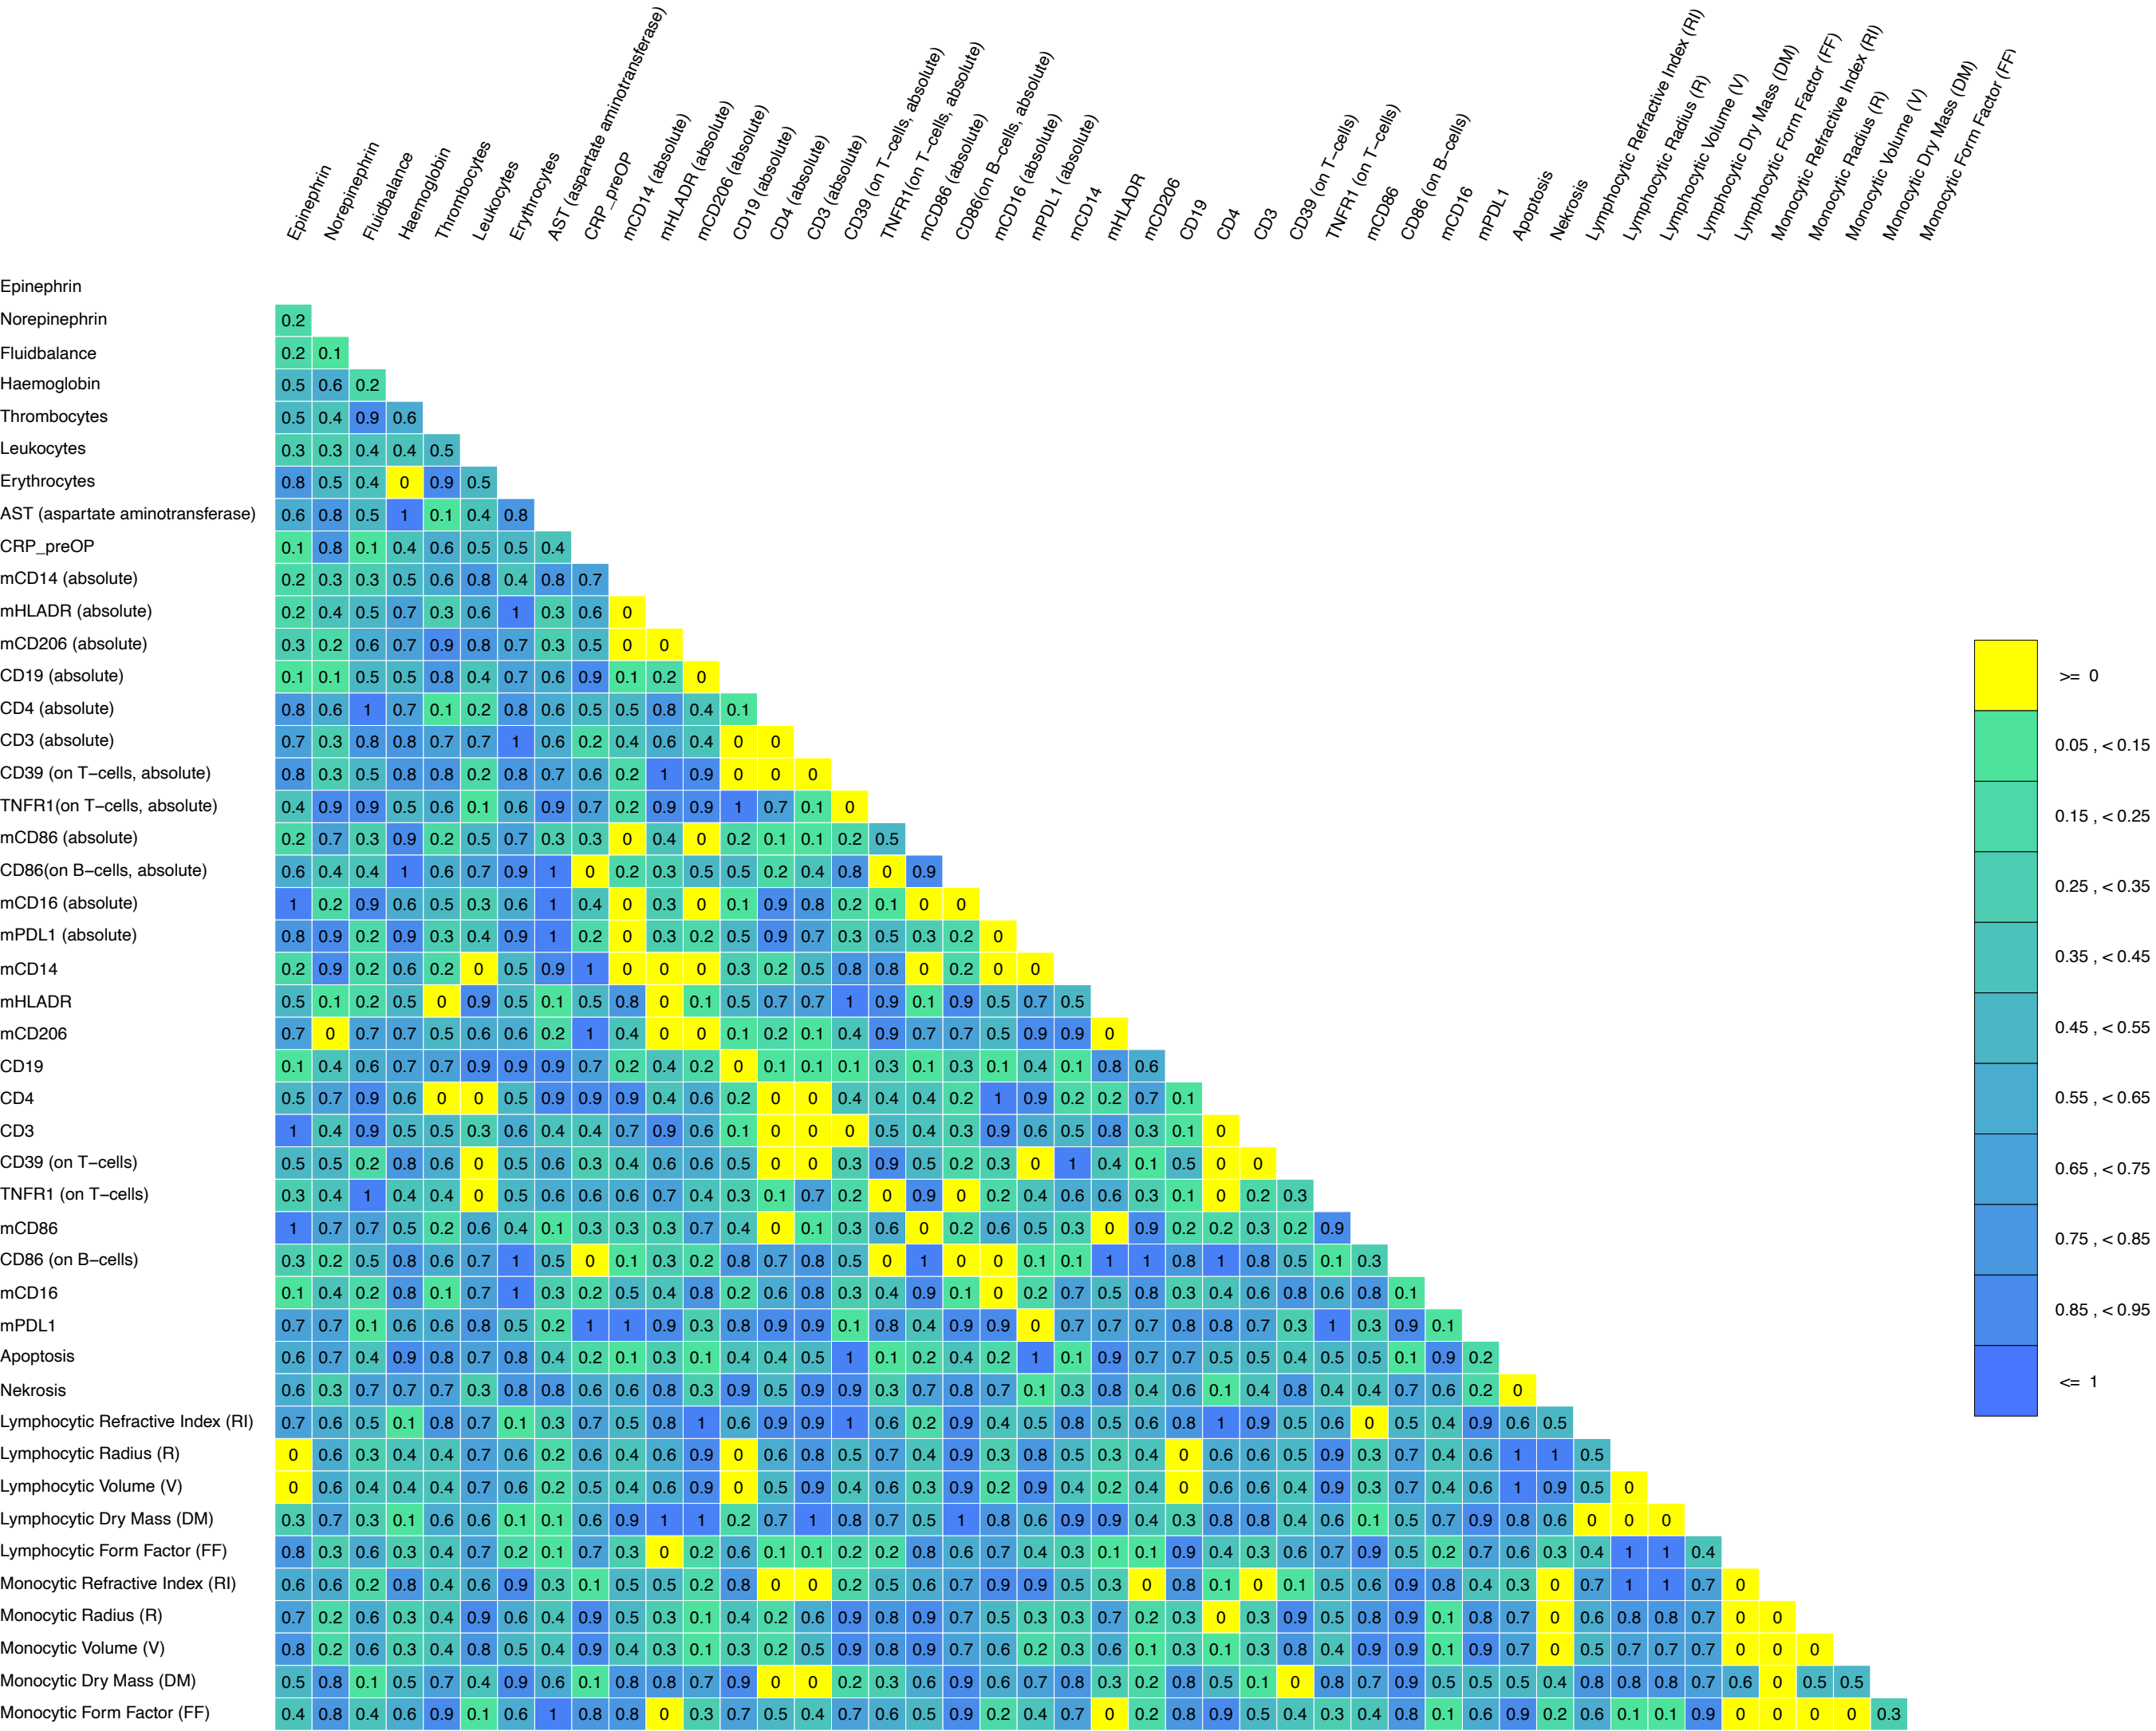

# Supplementary Figure S8

Correlation coefficients presented in a heat map. Bivariate correlations between changes of DHM data, flow cytometric parameters and epinephrine dose between timepoints PreOP and d1.

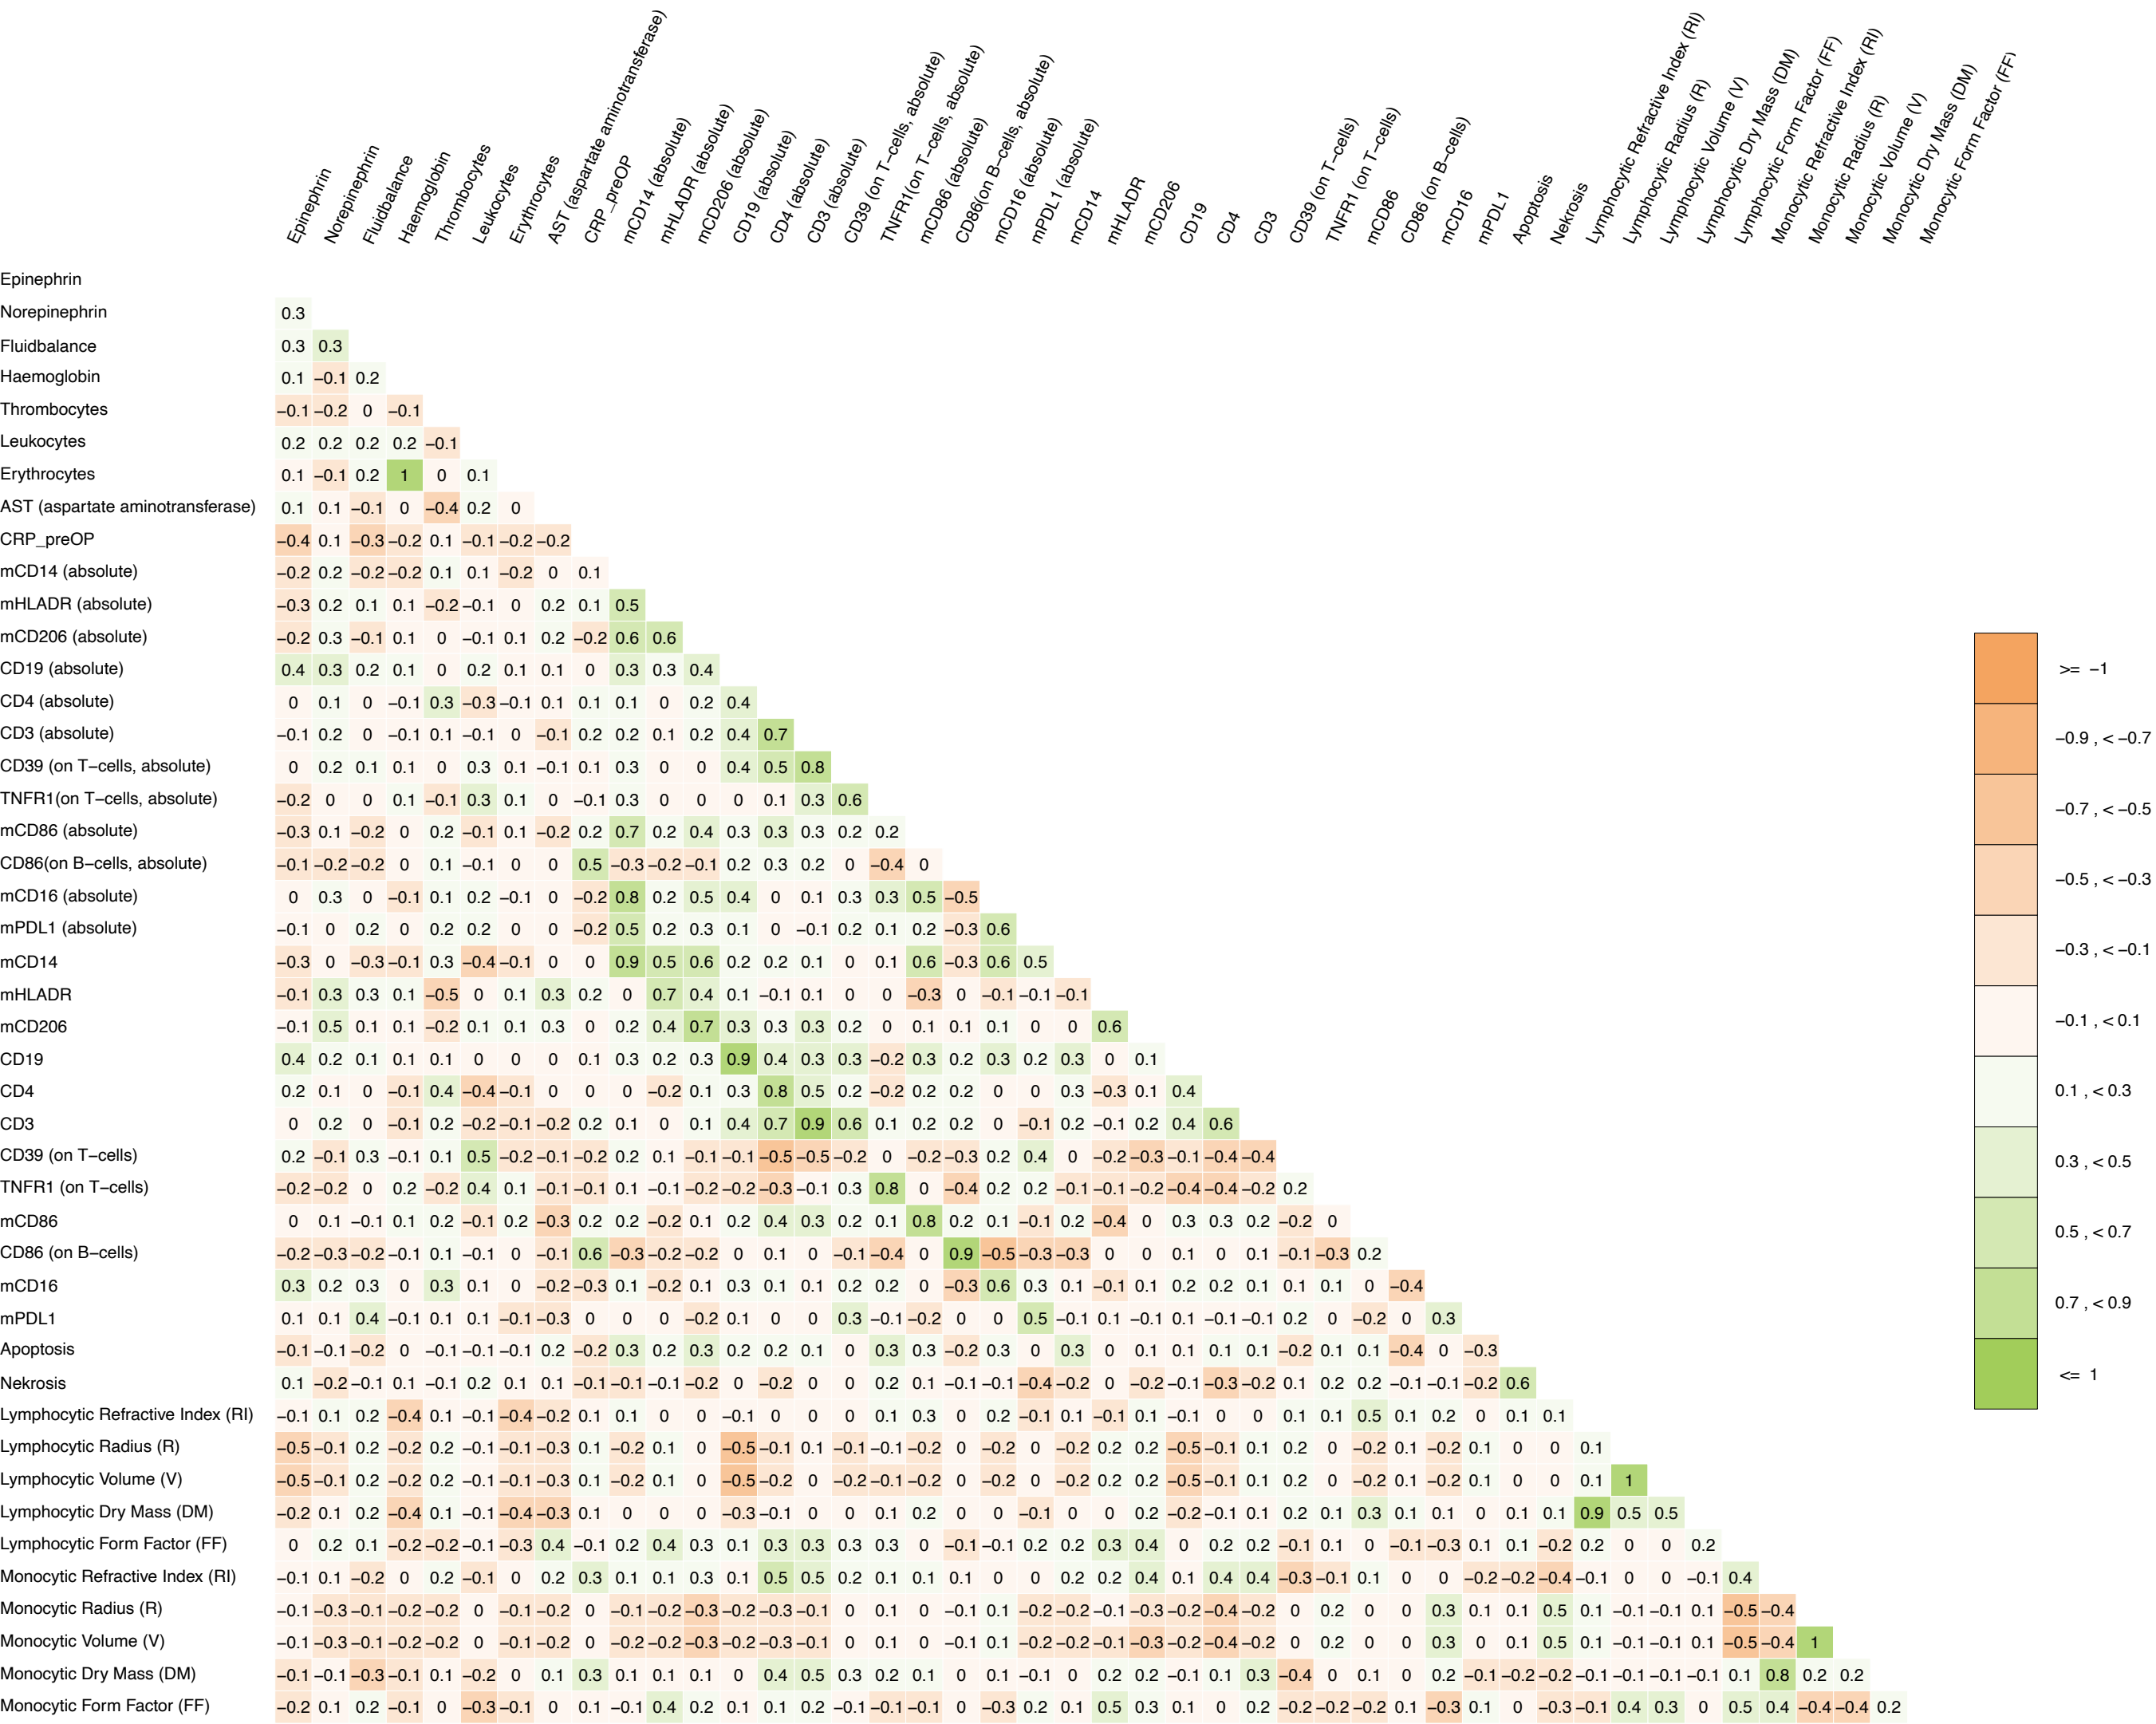

Supplement: s1 [file s1]
