# Supplementary material for: Digital Holographic Microscopy for Label-Free Detection of Leukocyte Alternations Associated with Perioperative Inflammation after Cardiac Surgery
Source: MDPI journal article supplement (doi:10.3390/cells11040755), 2022-02-21
Supplement: s1 [file s1]

# Supplement S3

Corresponding to Fig. 4

Density scatterplots of all individual patients (n=25)

Pat. 1

PreOP

Day 1

Day 3

Day 6

A

$n_{\text{cell}}$

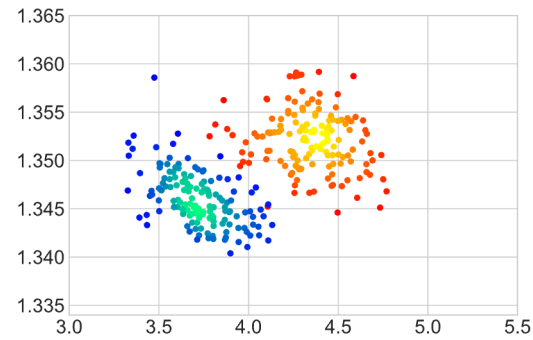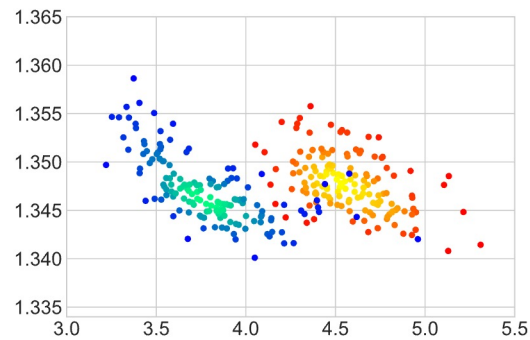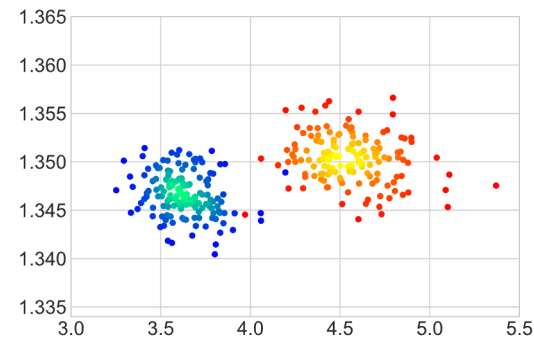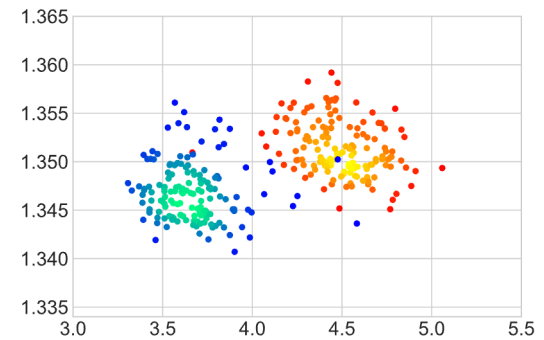

B

DM [ng]

R [μm]

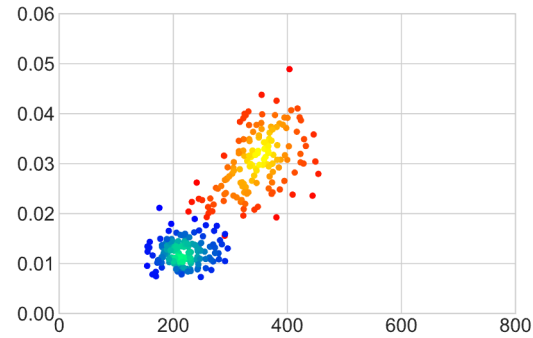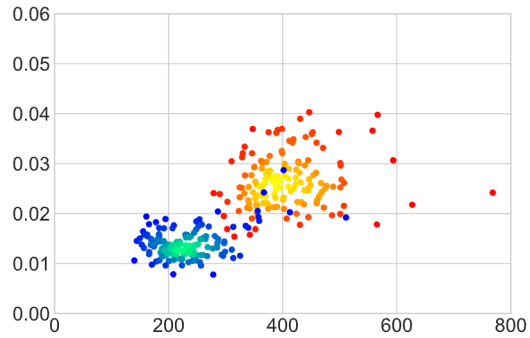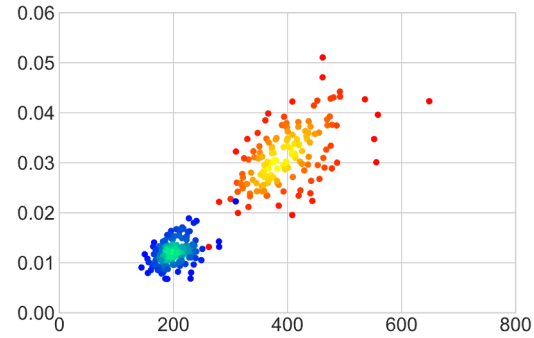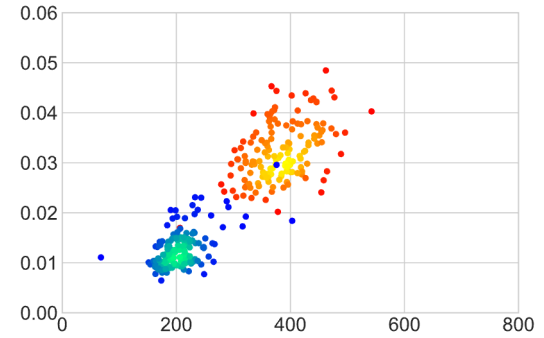

C

FF

V [μm³]

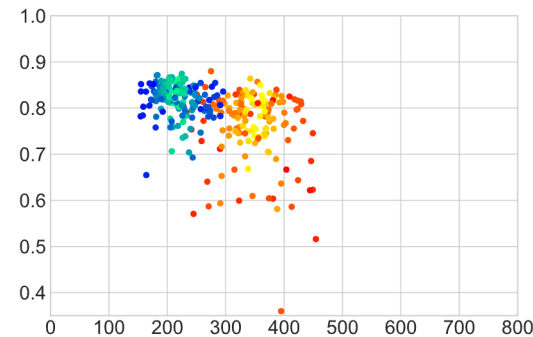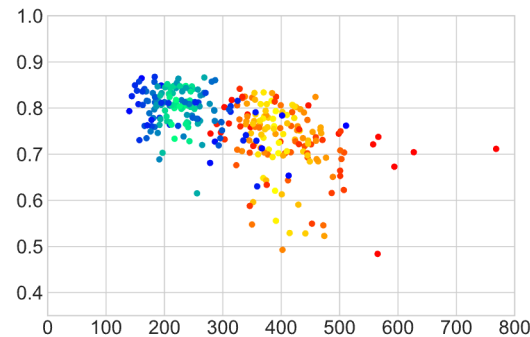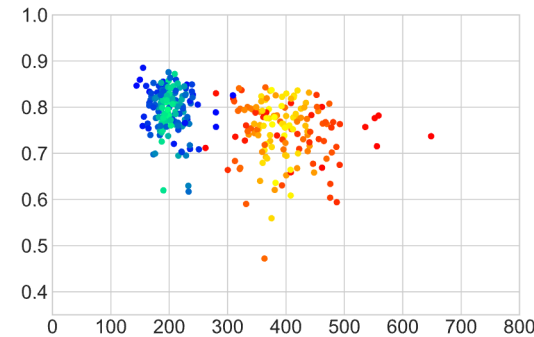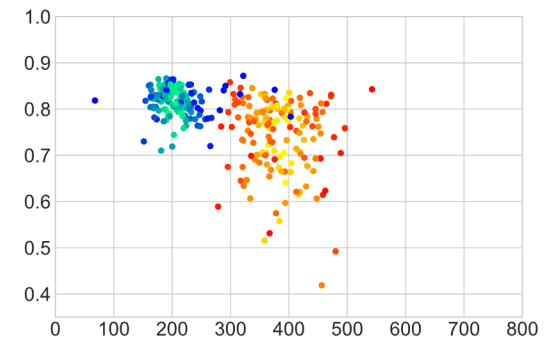

V [μm³]

density

Lymphocytes

density

Monocytes

Pat. 2

PreOP

Day 1

Day 3

Day 6

A

$n_{\text{cell}}$

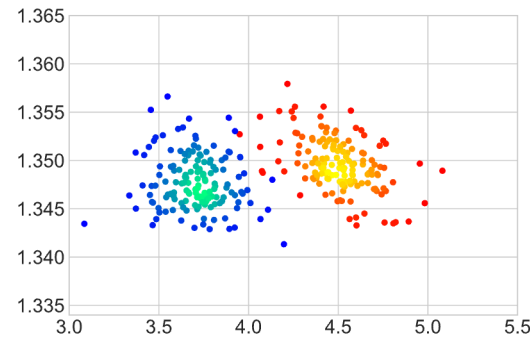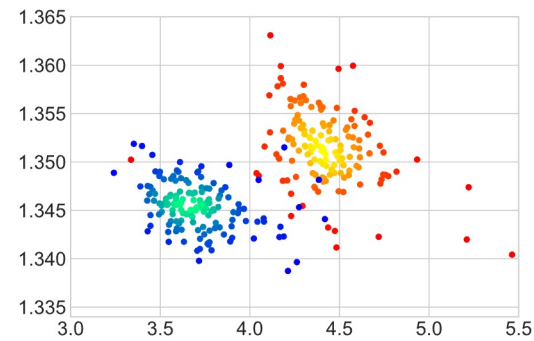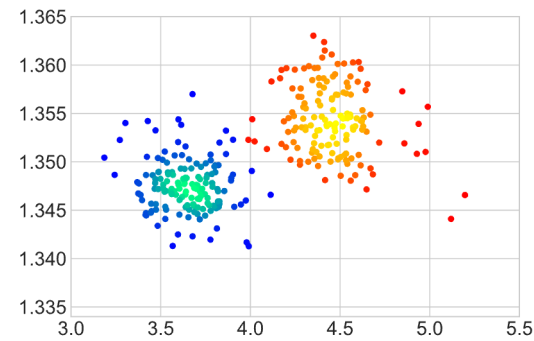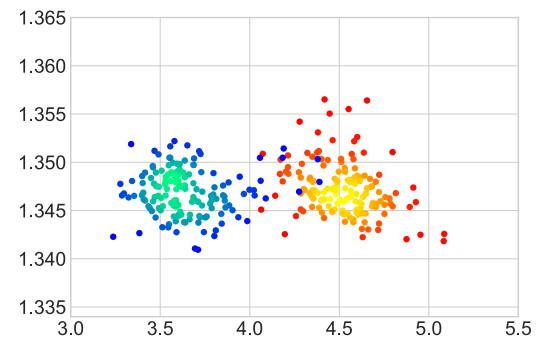

B

DM [ng]

R [μm]

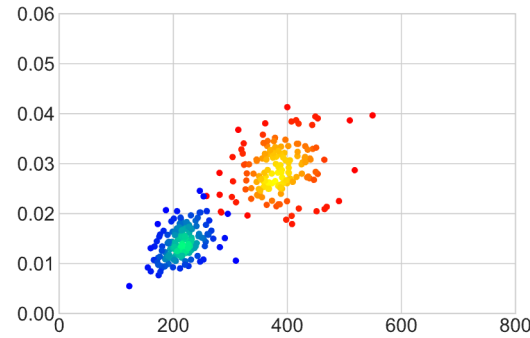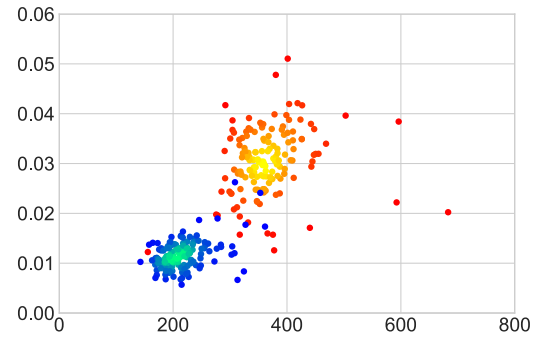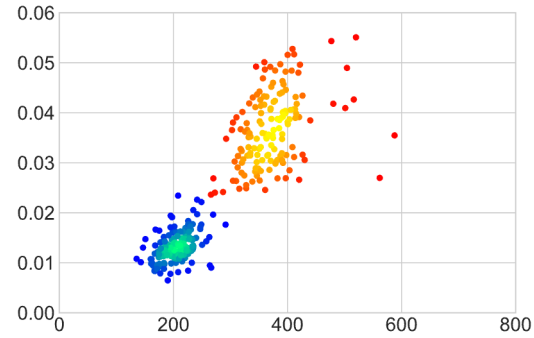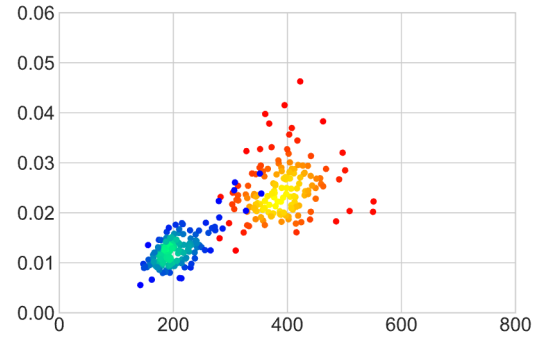

C

FF

V [μm³]

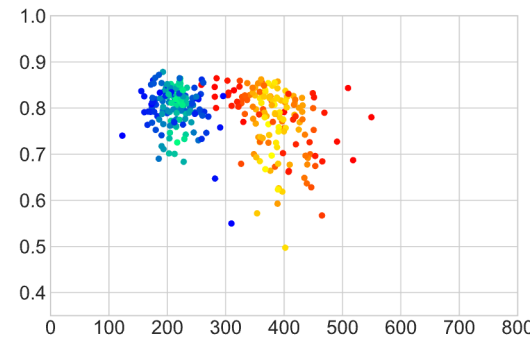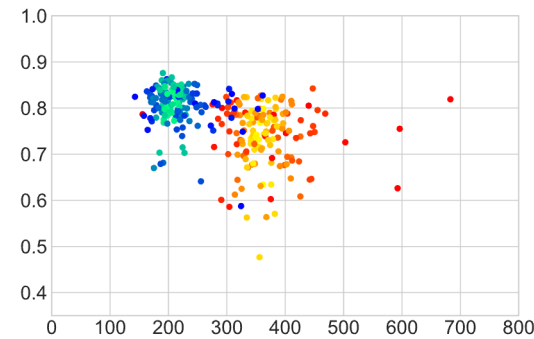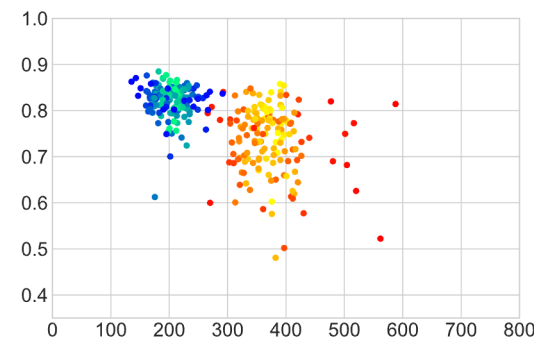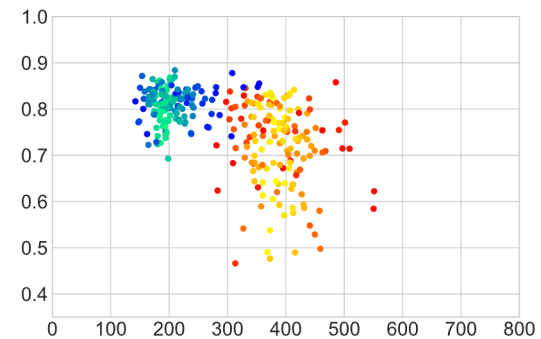

V [μm³]

density

Lymphocytes

density

Monocytes

Pat. 3

PreOP

Day 1

Day 3

Day 6

A

$n_{\text{cell}}$

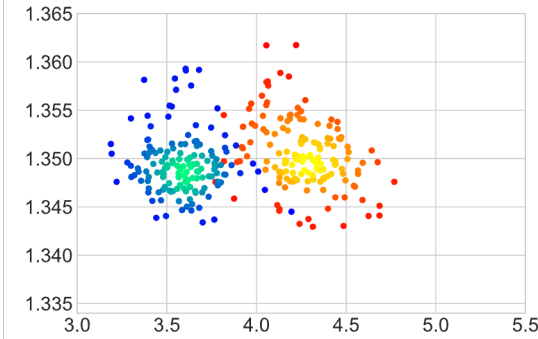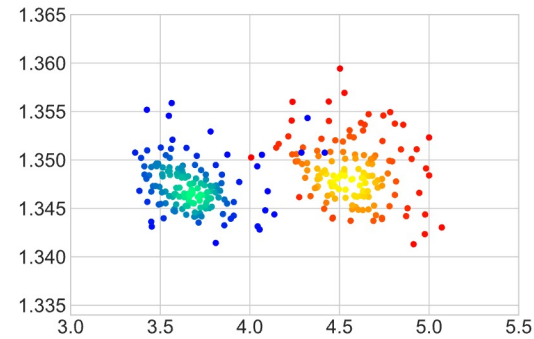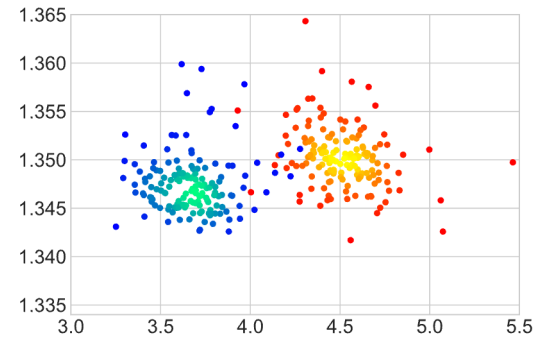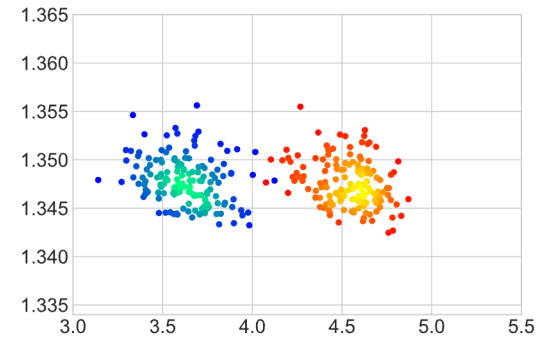

B

DM [ng]

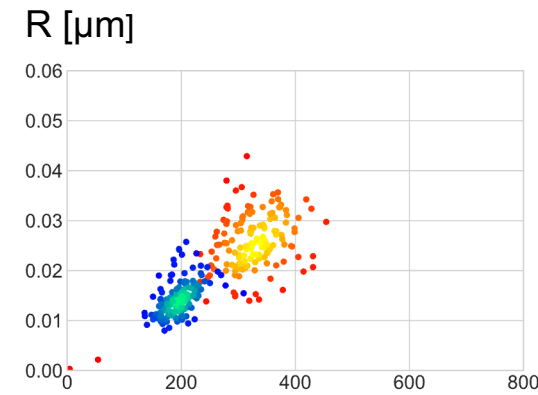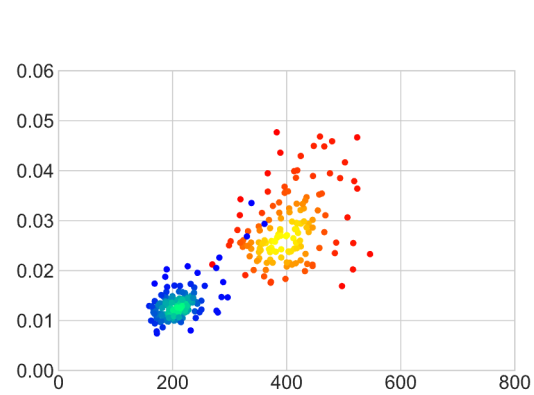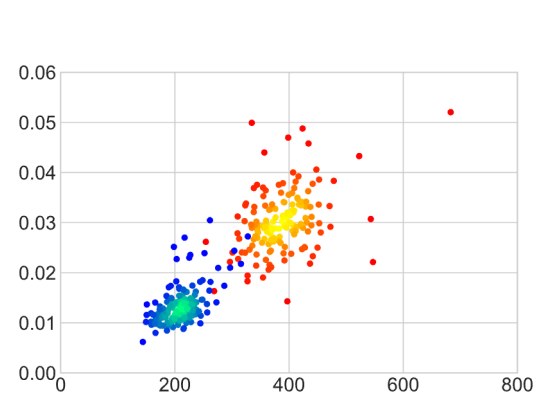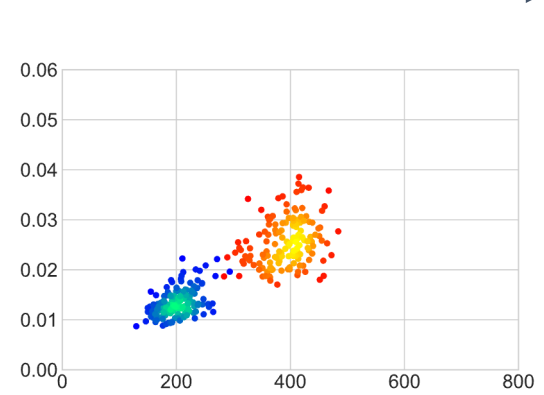

C

FF

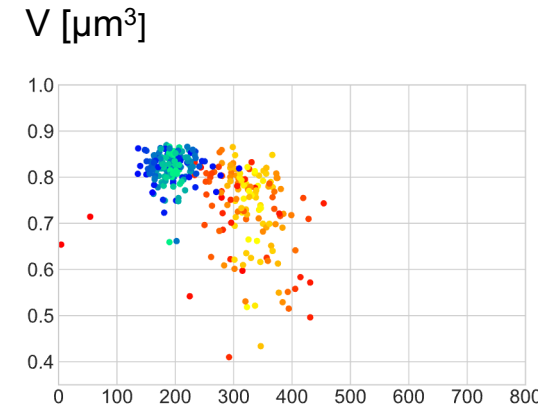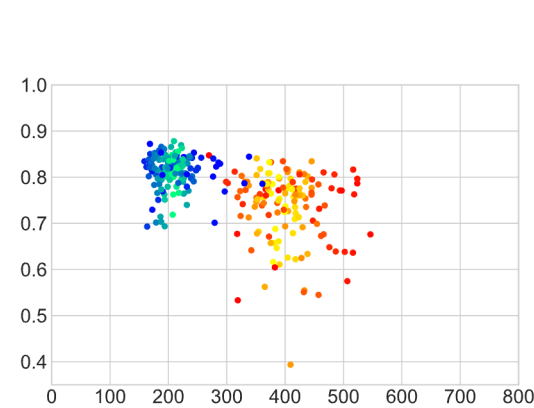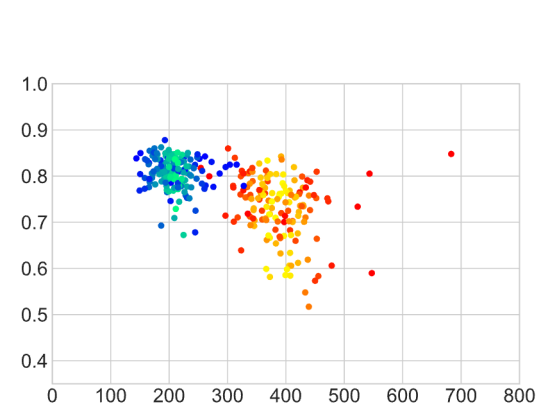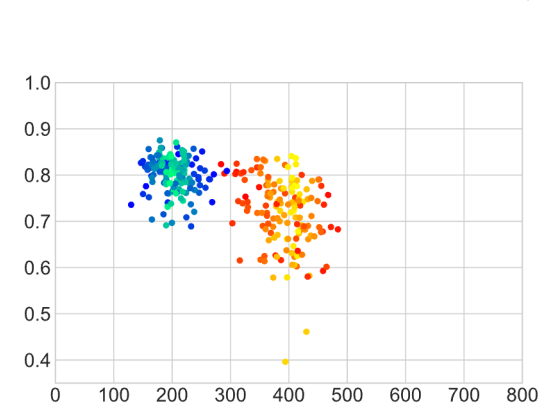

$V [\mu\text{m}^3]$

density

Lymphocytes

density

Monocytes



**Pat. 4**

PreOP

Day 1

Day 3

Day 6

**A**

$n_{\text{cell}}$

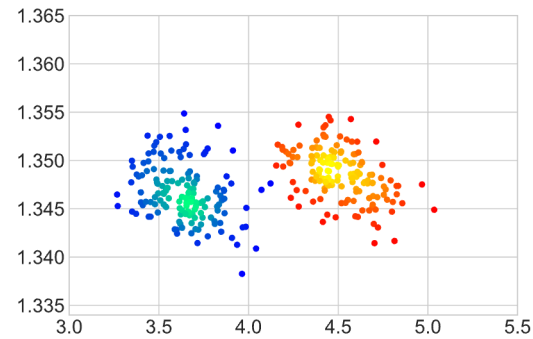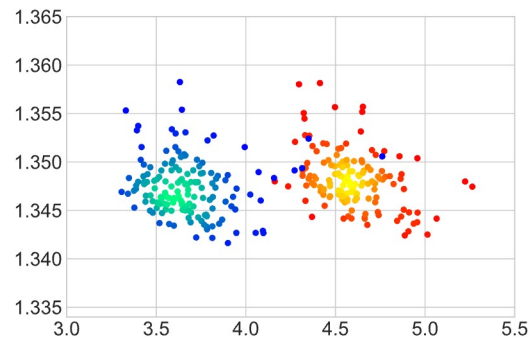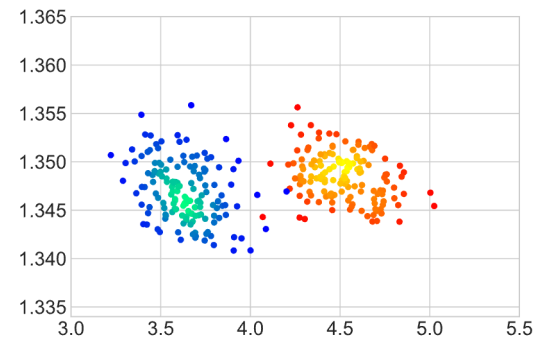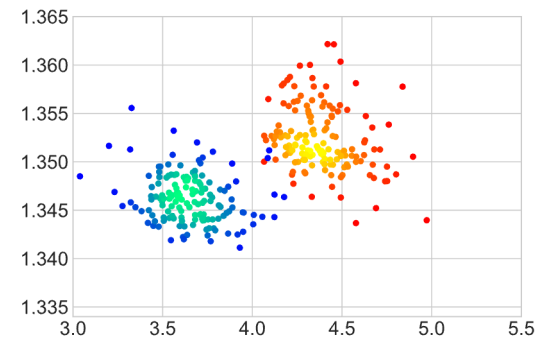

**B**

DM [ng]

$R [\mu\text{m}]$

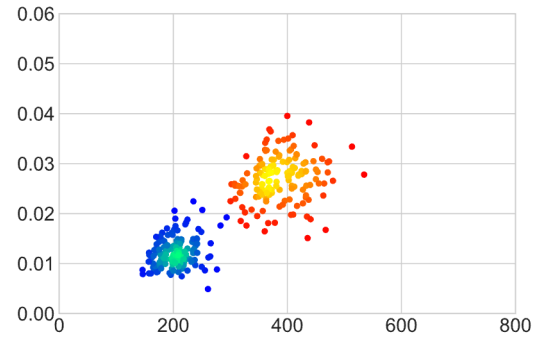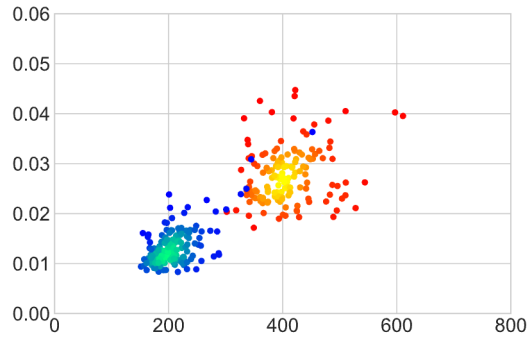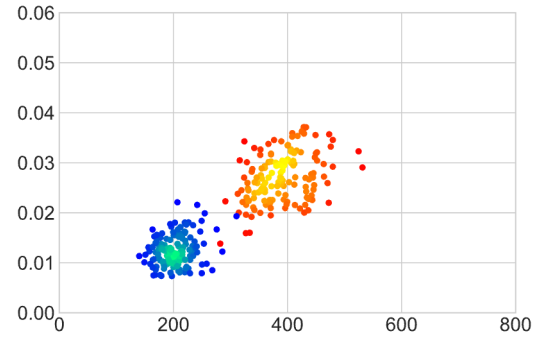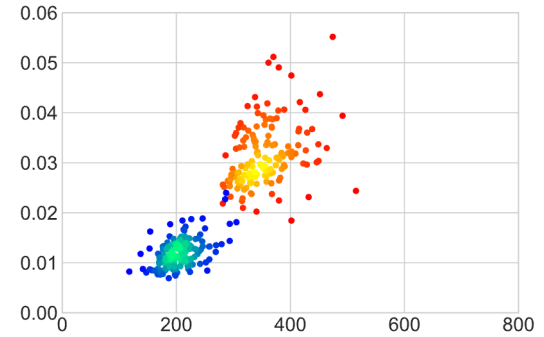

**C**

FF

$V [\mu\text{m}^3]$

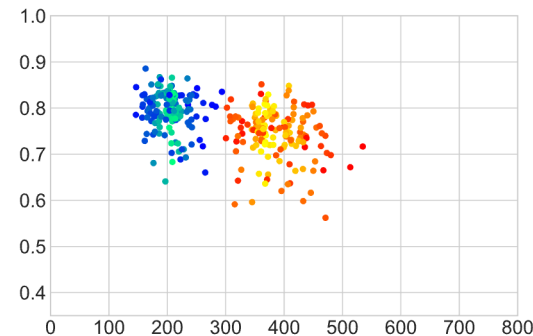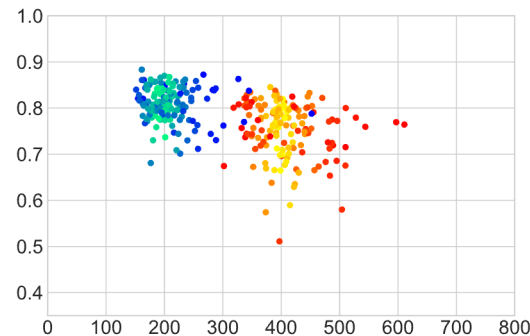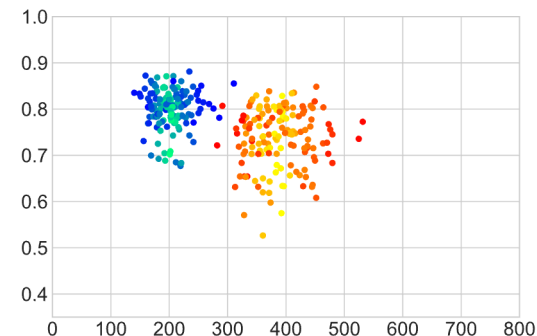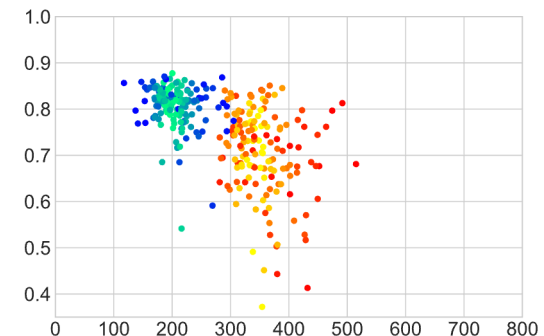

$V [\mu\text{m}^3]$

density

Lymphocytes

density

Monocytes

**Pat. 5**

PreOP

Day 1

Day 3

Day 6

**A** $n_{\text{cell}}$ 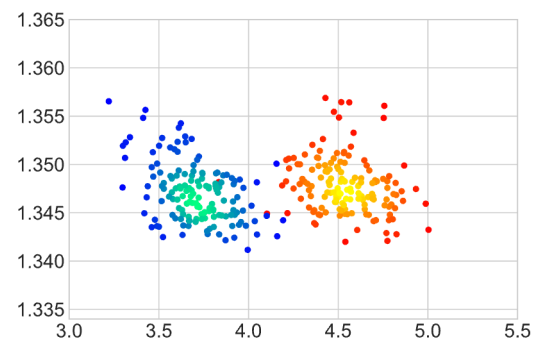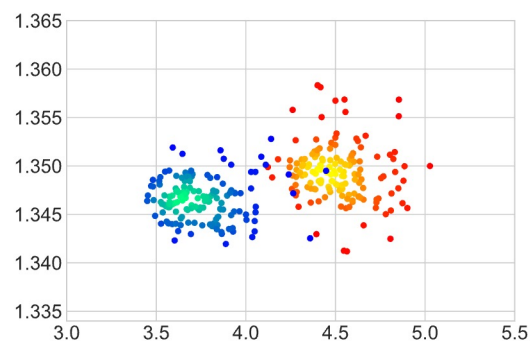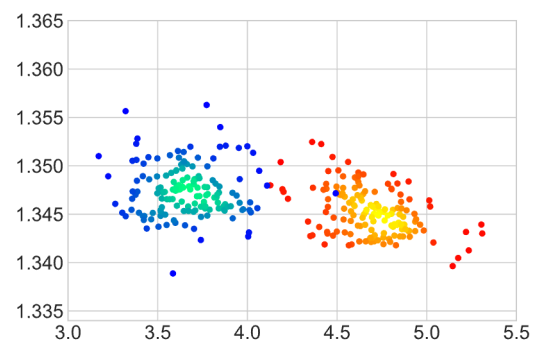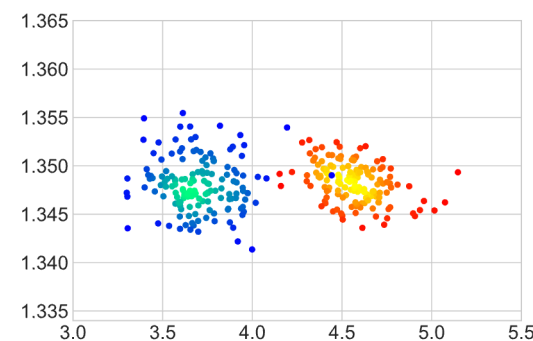**B**

DM [ng]

 $R [\mu\text{m}]$ 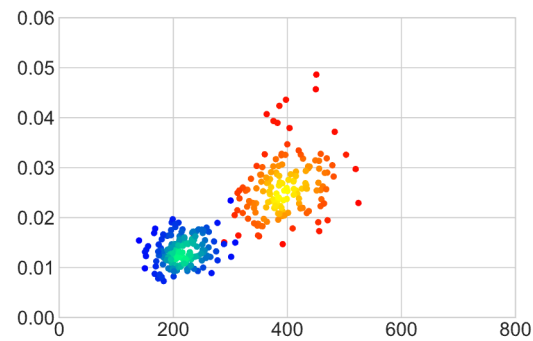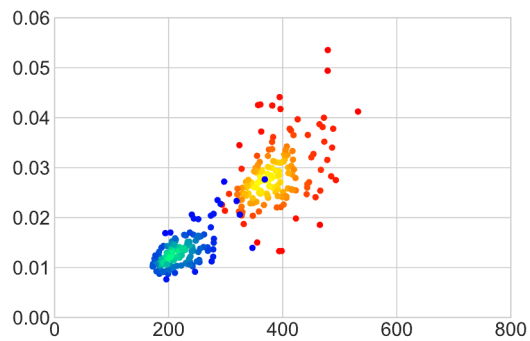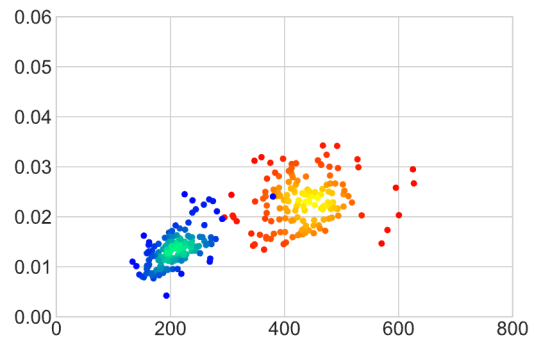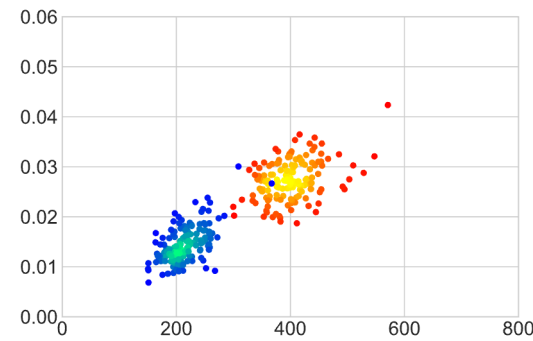**C**

FF

 $V [\mu\text{m}^3]$ 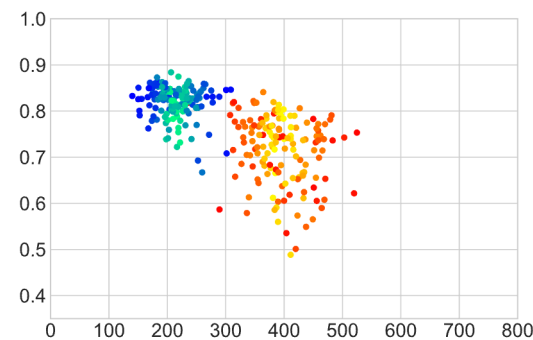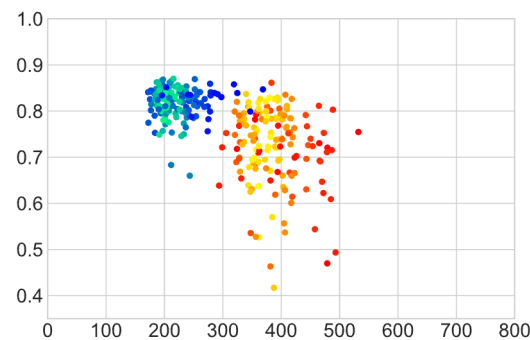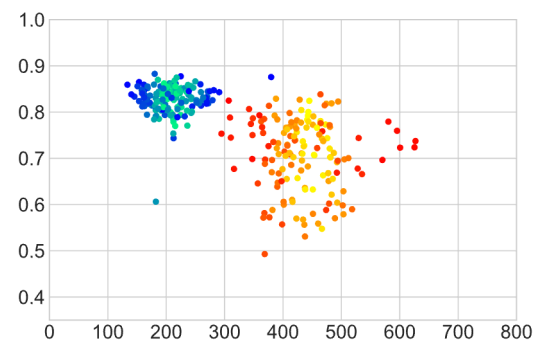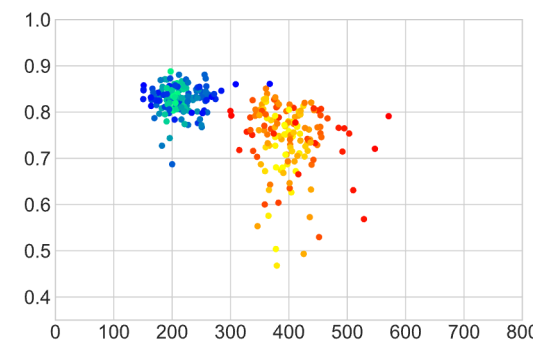 $V [\mu\text{m}^3]$ 

density

Lymphocytes

density

Monocytes

**Pat. 6**

PreOP

Day 1

Day 3

Day 6

**A**

$n_{\text{cell}}$

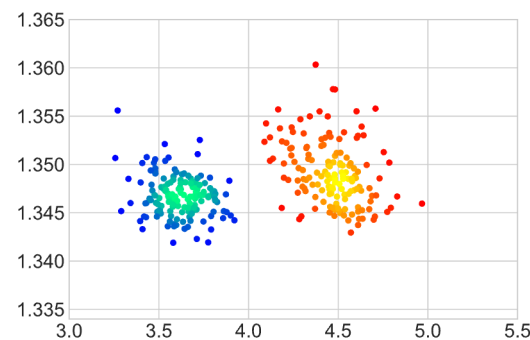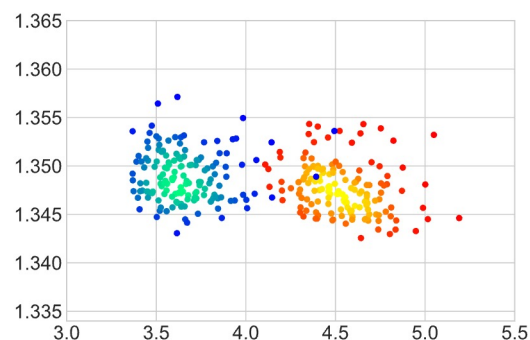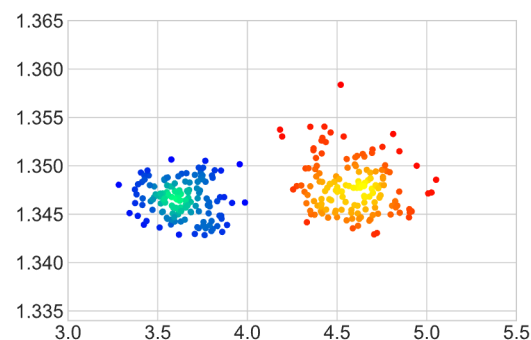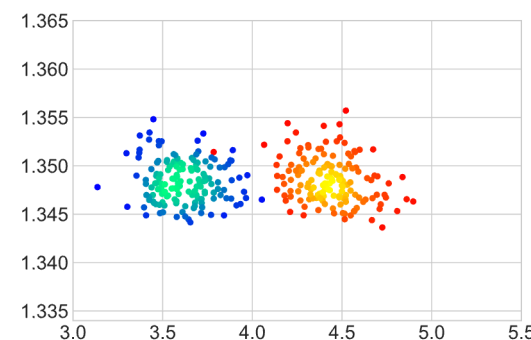

**B**

DM [ng]

R [μm]

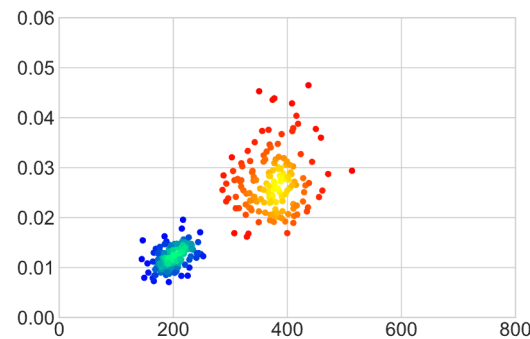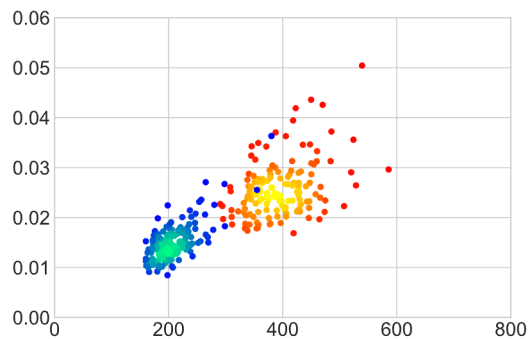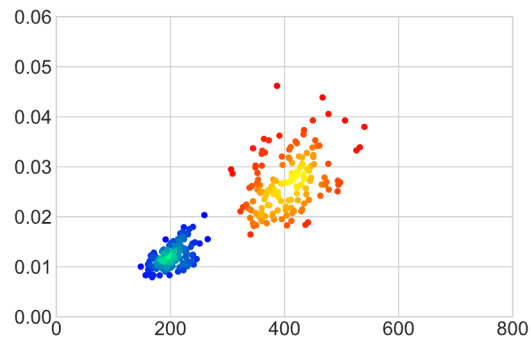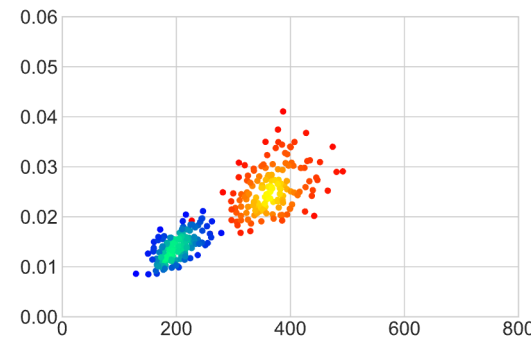

**C**

FF

V [μm³]

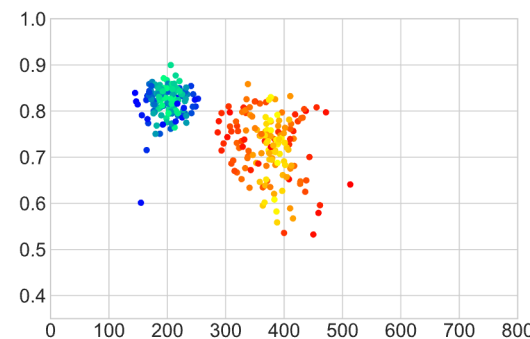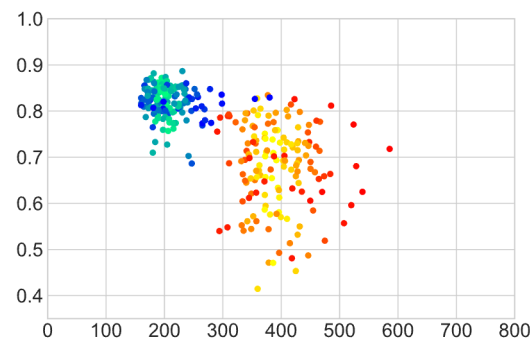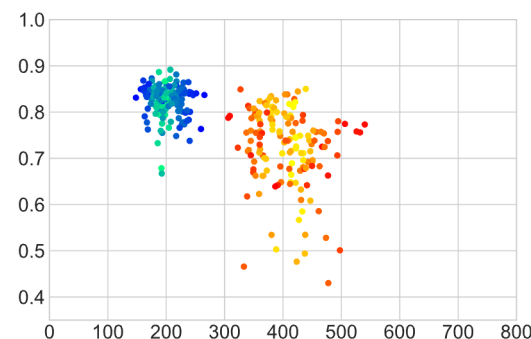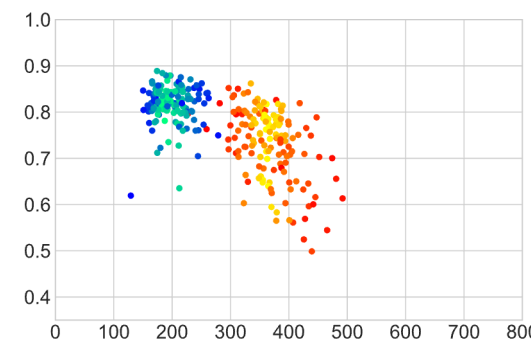

V [μm³]

density

Lymphocytes

density

Monocytes

Pat. 7

PreOP

Day 1

Day 3

Day 6

A

$n_{\text{cell}}$

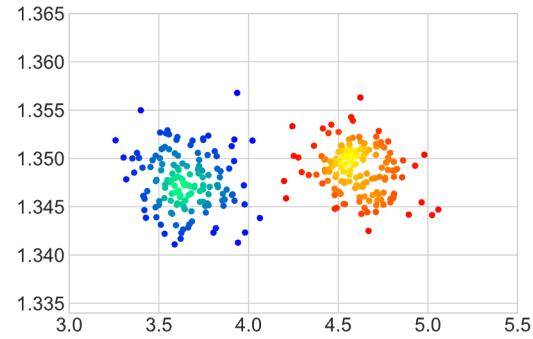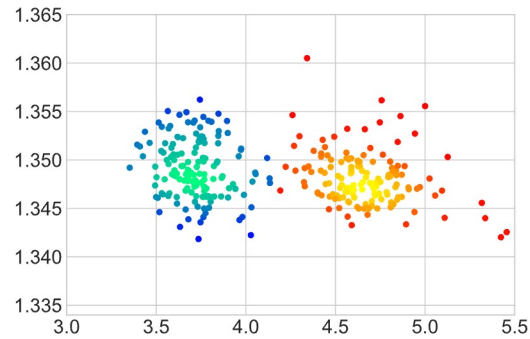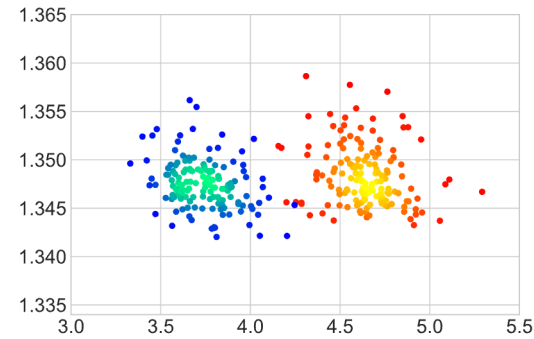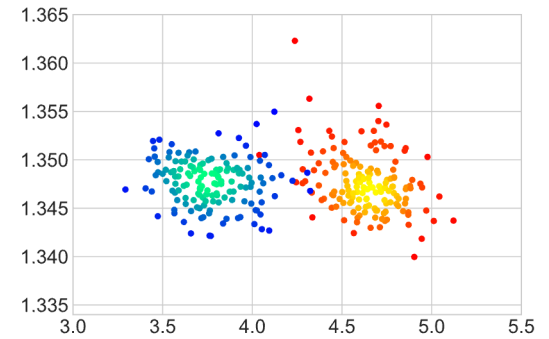

B

DM [ng]

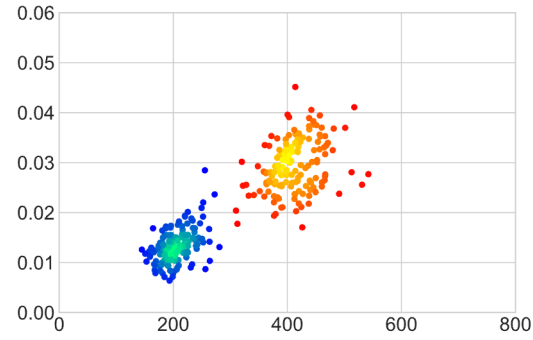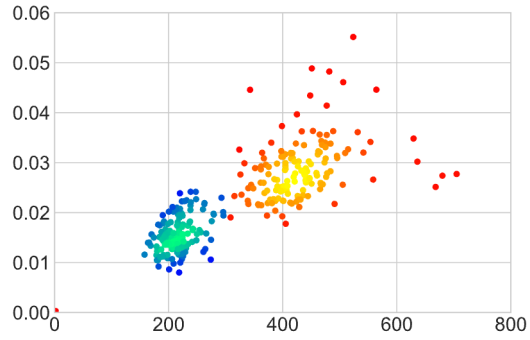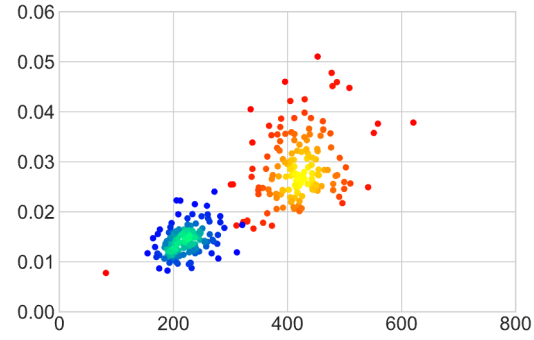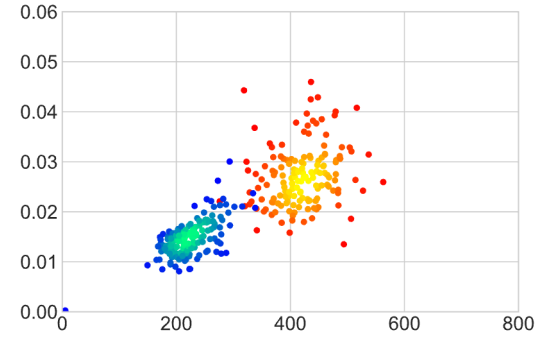

C

FF

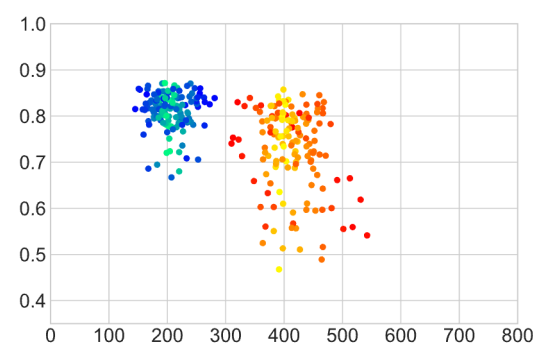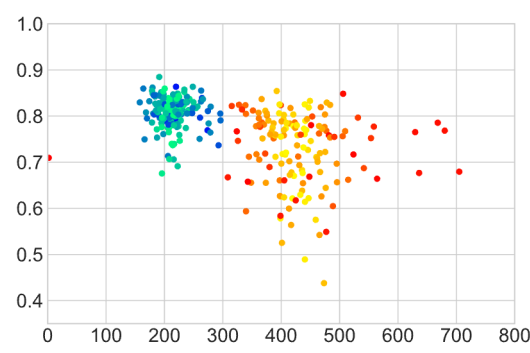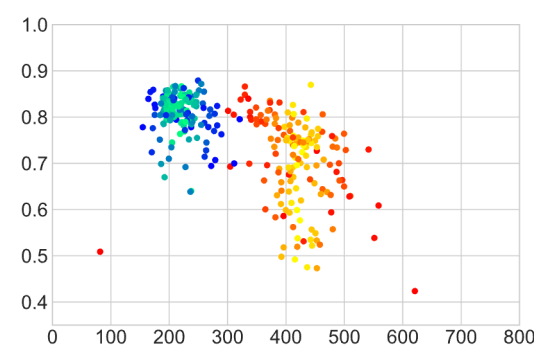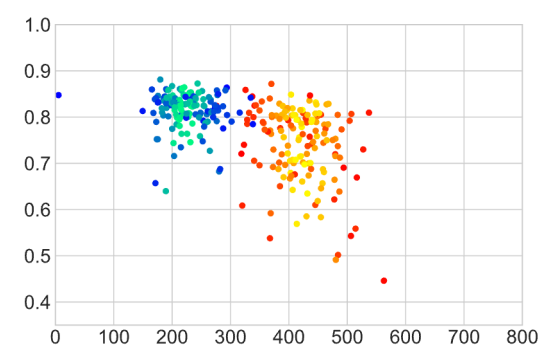

$V [\mu\text{m}^3]$

density

Lymphocytes

density

Monocytes

**Pat. 8**

PreOP

Day 1

Day 3

Day 6

**A**

$n_{\text{cell}}$

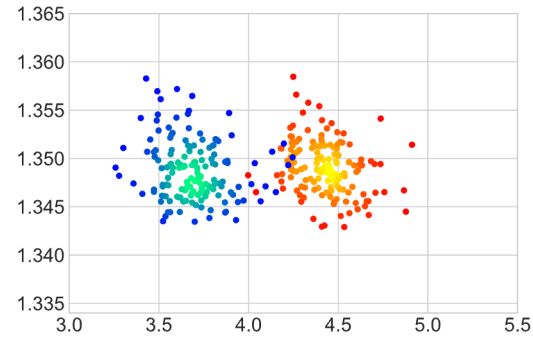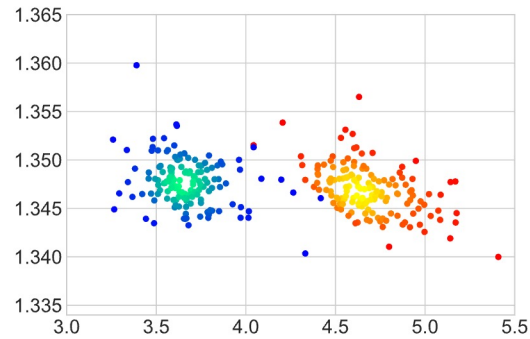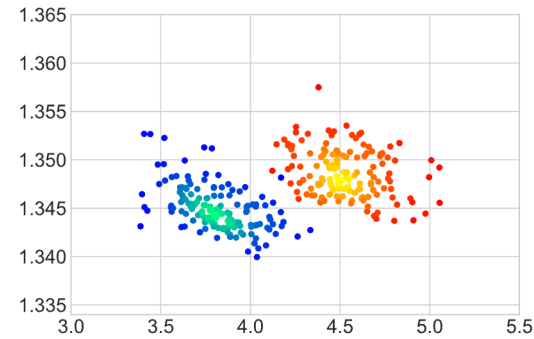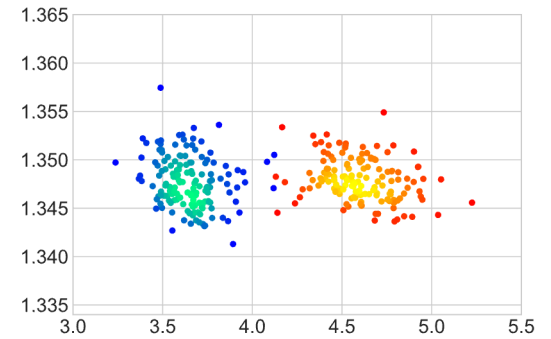

**B**

DM [ng]

R [μm]

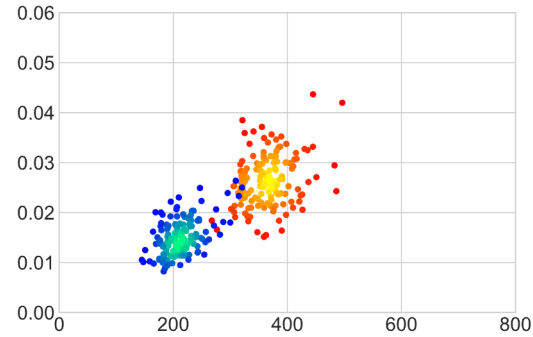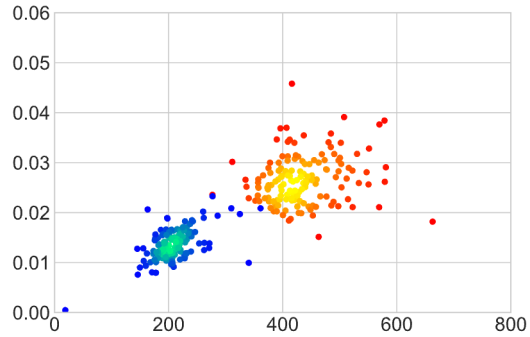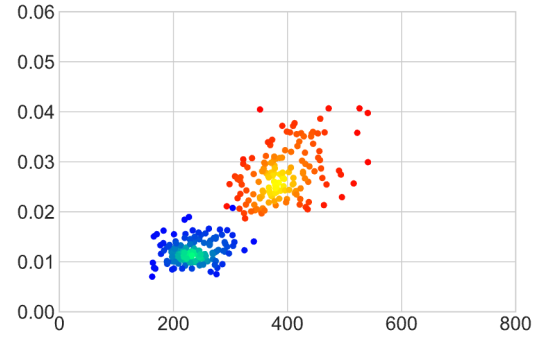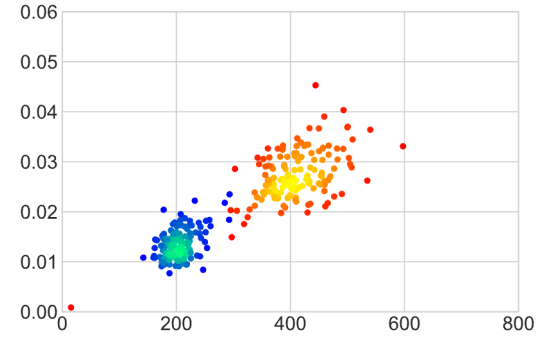

**C**

FF

V [μm³]

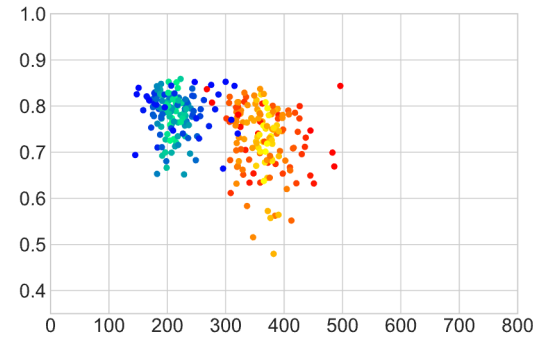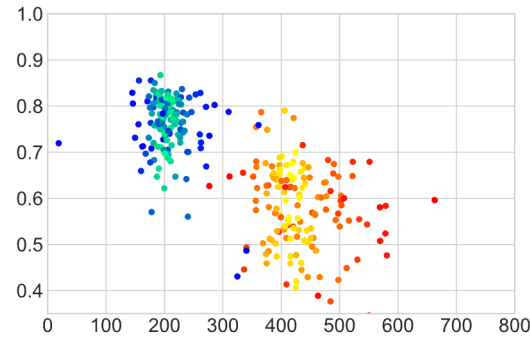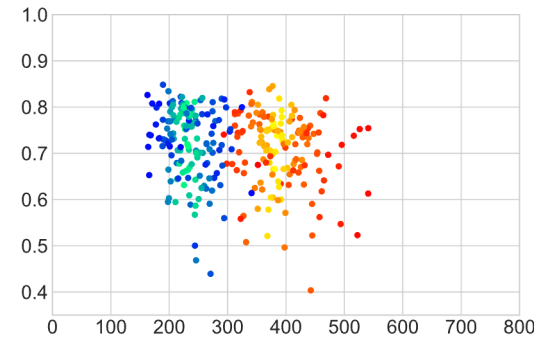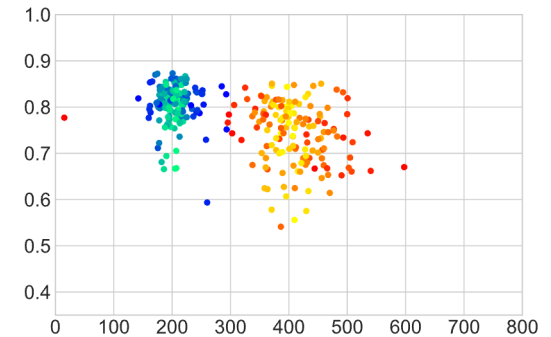

V [μm³]

density

Lymphocytes

density

Monocytes

**Pat. 9**

PreOP

Day 1

Day 3

Day 6

**A**

$n_{\text{cell}}$

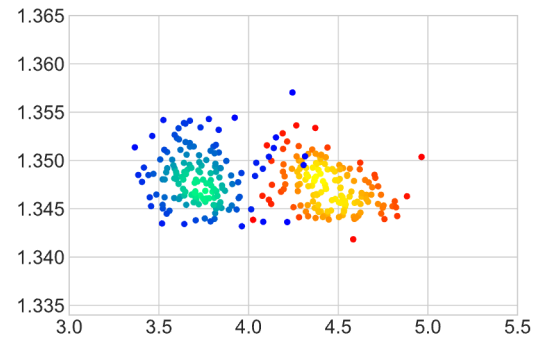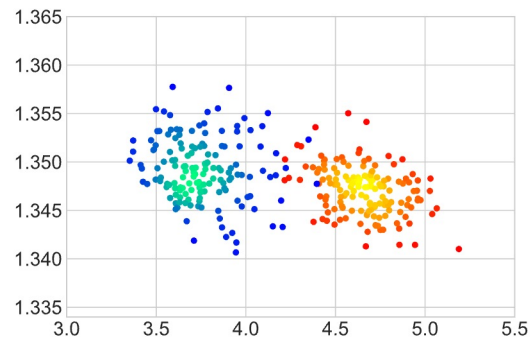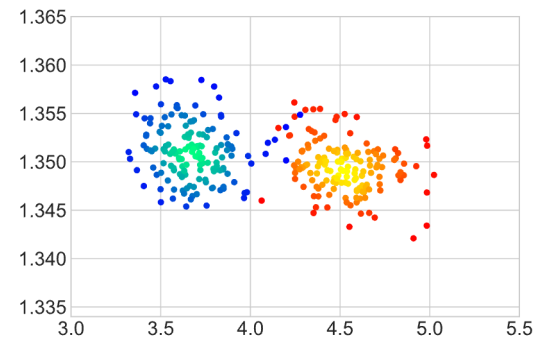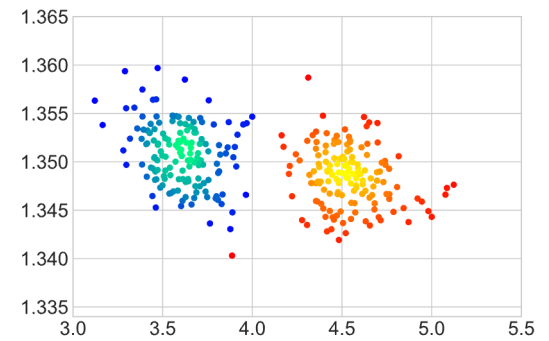

**B**

DM [ng]

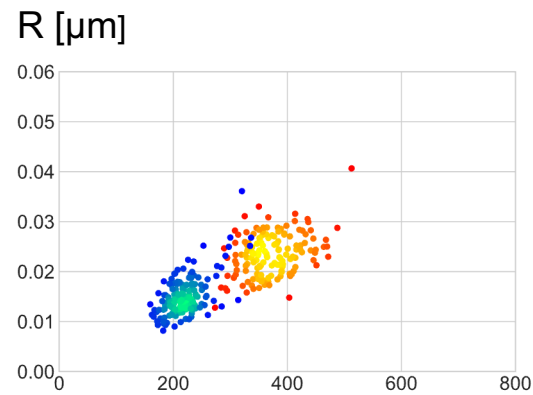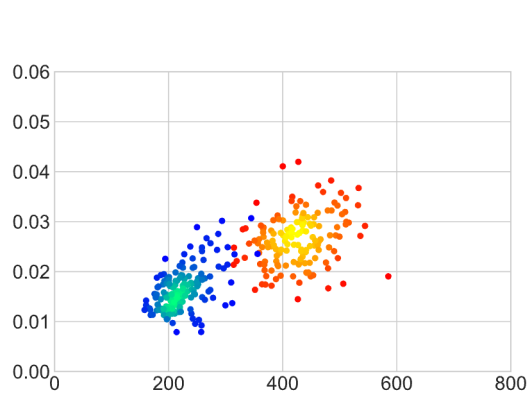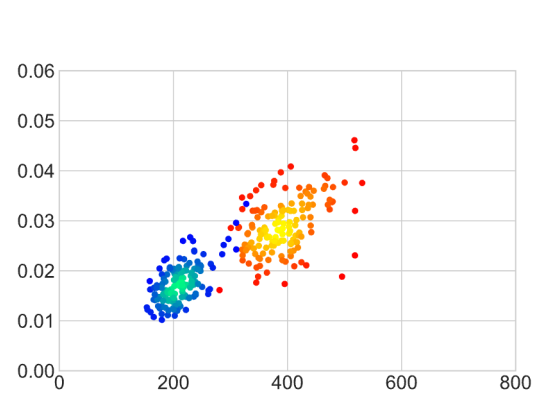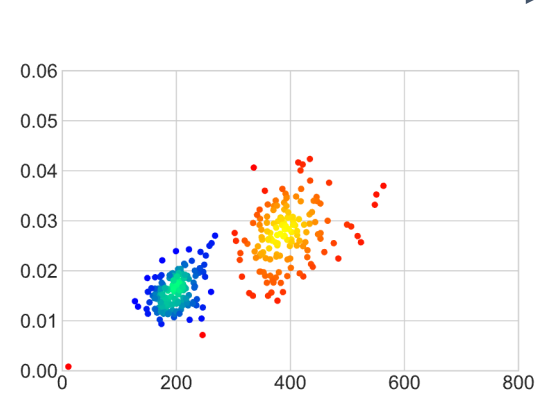

**C**

FF

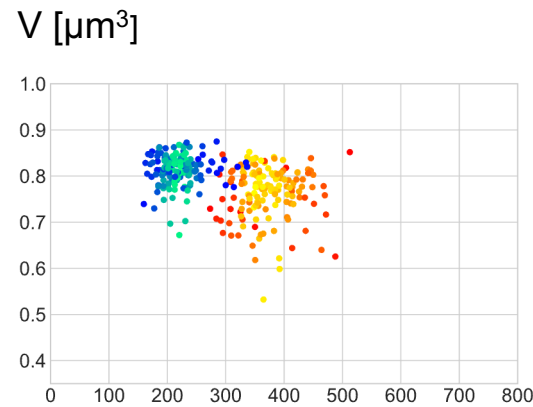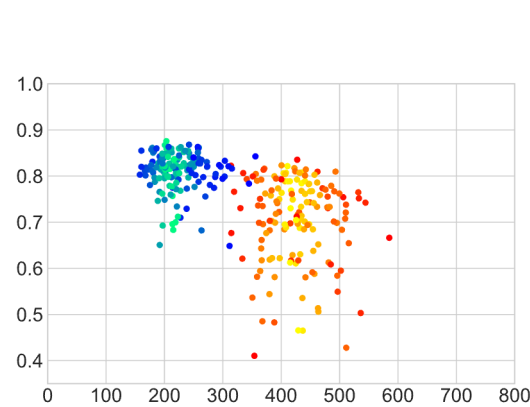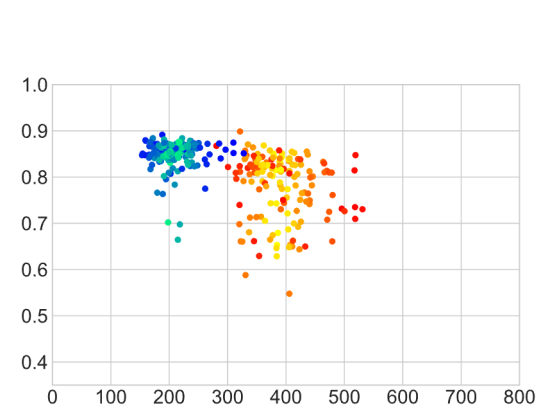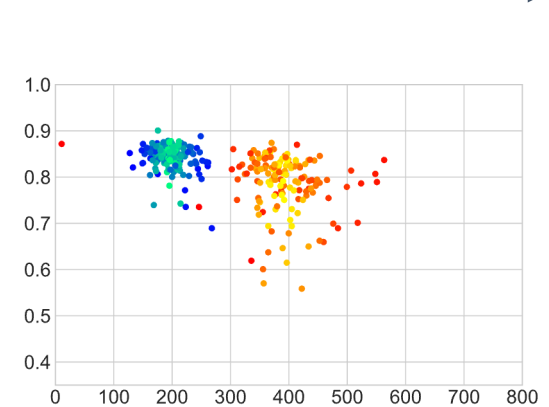

$V [\mu\text{m}^3]$

density

Lymphocytes

density

Monocytes

Pat. 10

PreOP

Day 1

Day 3

Day 6

A

$n_{\text{cell}}$

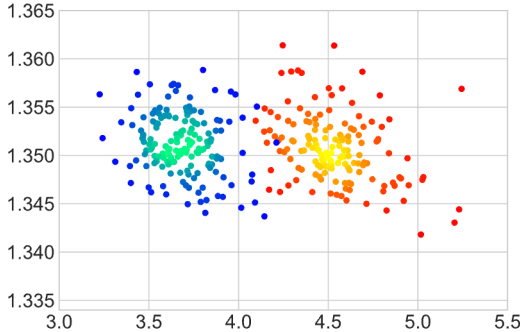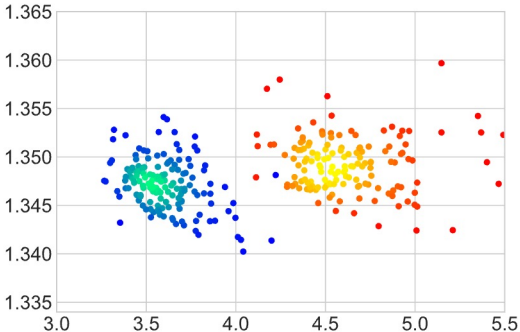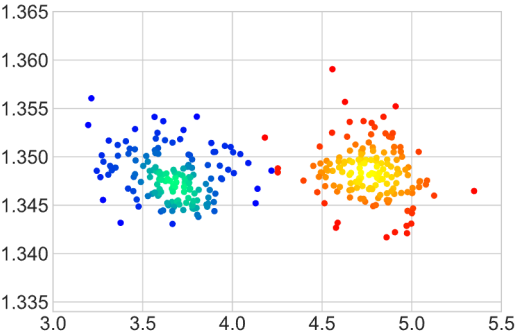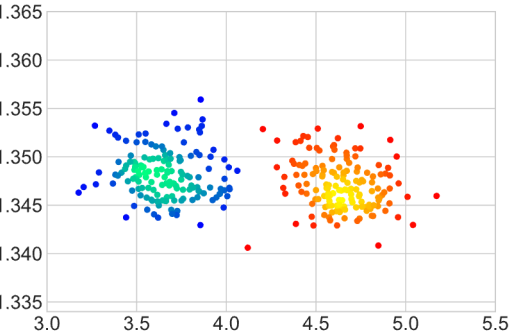

B

DM [ng]

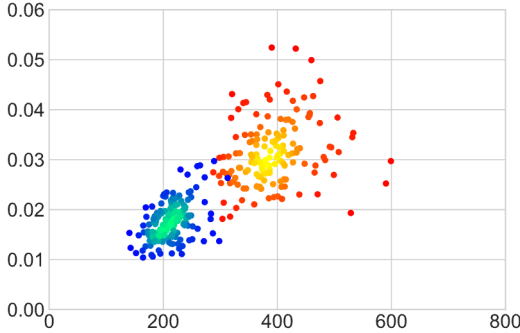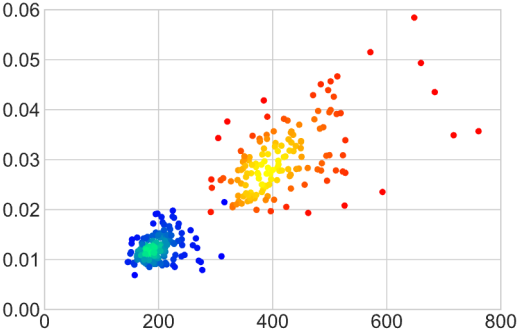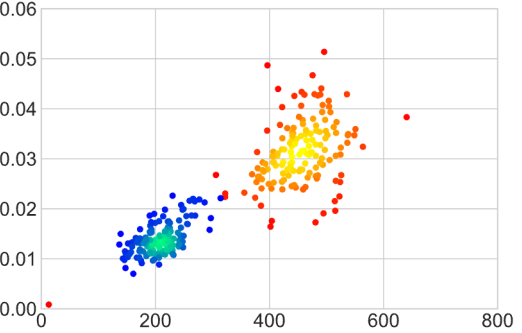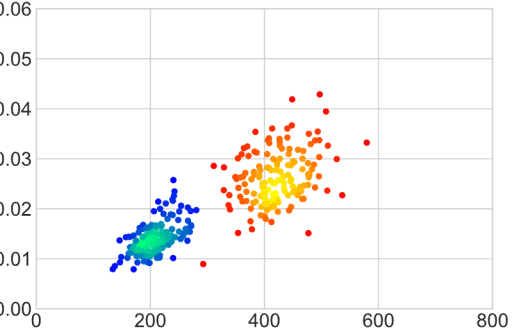

C

FF

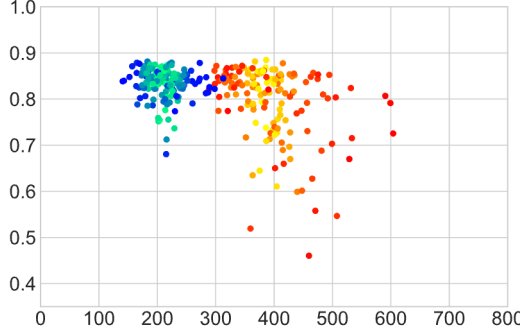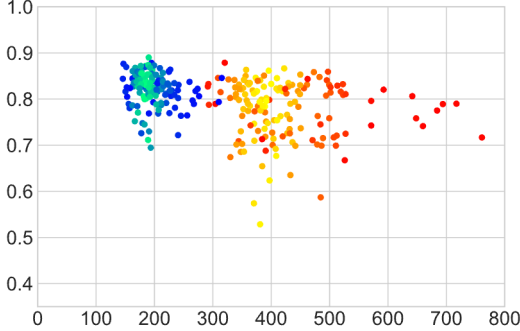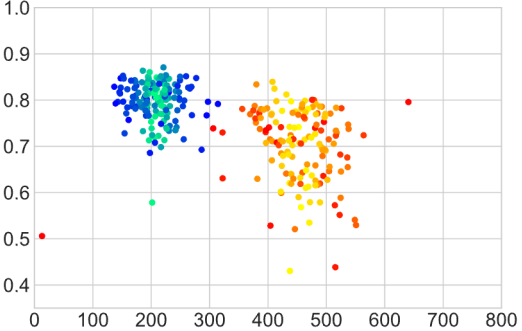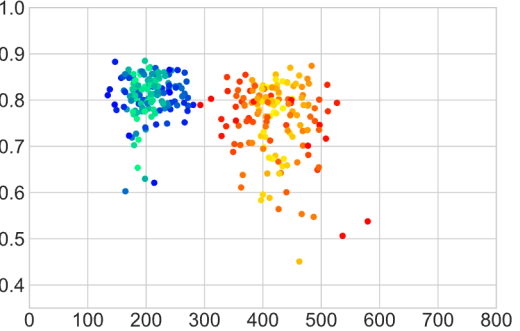

$V [\mu\text{m}^3]$

density

Lymphocytes

density

Monocytes



Pat. 11

PreOP

Day 1

Day 3

Day 6

A

$n_{\text{cell}}$

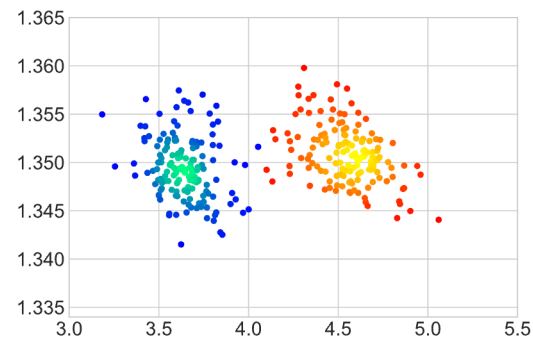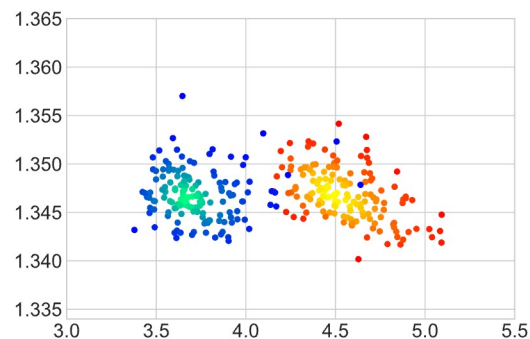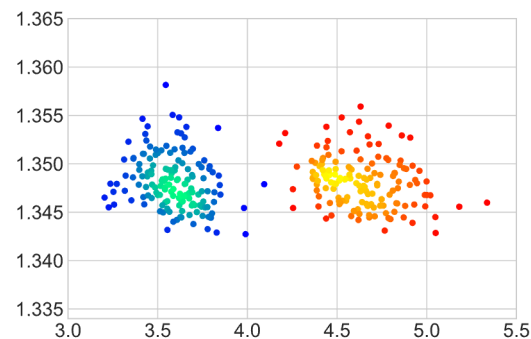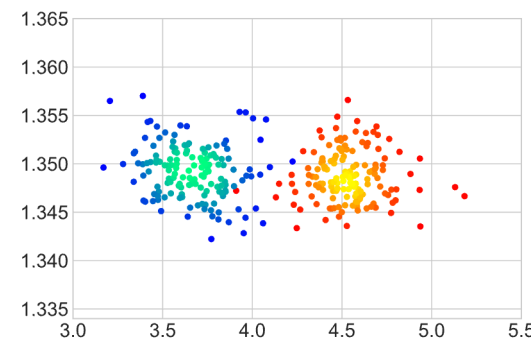

B

DM [ng]

$R [\mu\text{m}]$

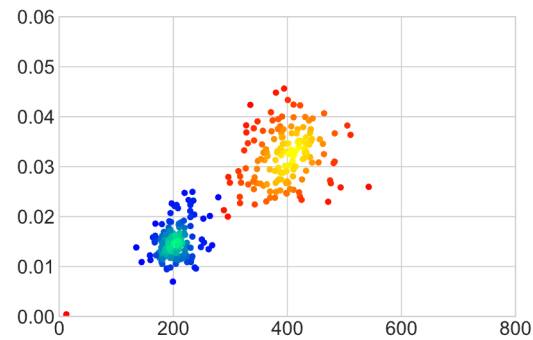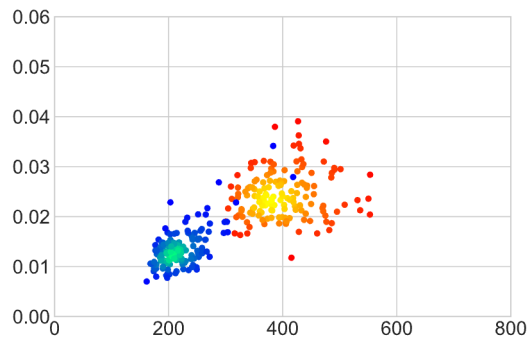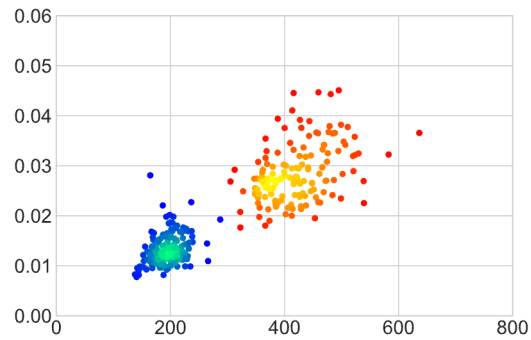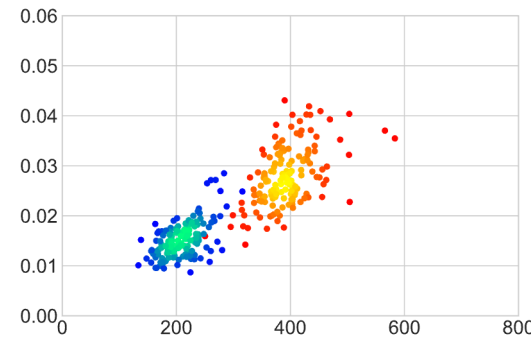

C

FF

$V [\mu\text{m}^3]$

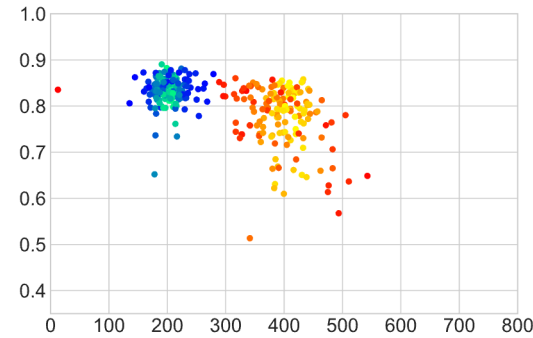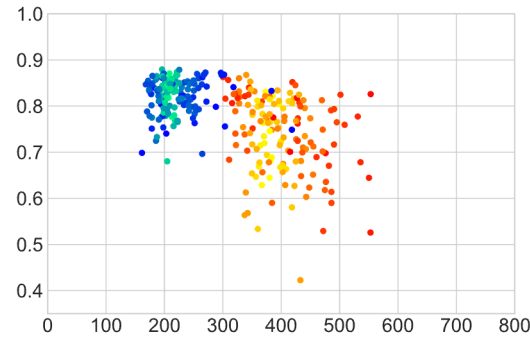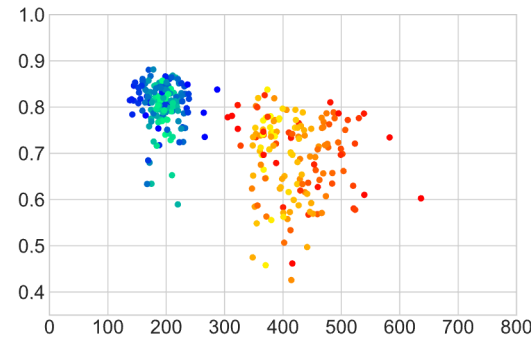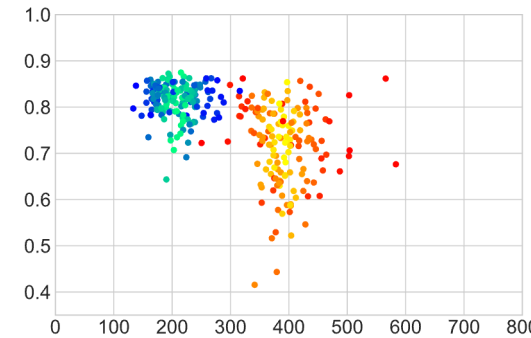

$V [\mu\text{m}^3]$

density

Lymphocytes

density

Monocytes



Pat. 12

PreOP

Day 1

Day 3

Day 6

A

$n_{\text{cell}}$

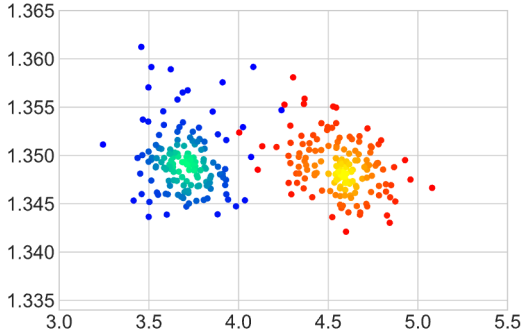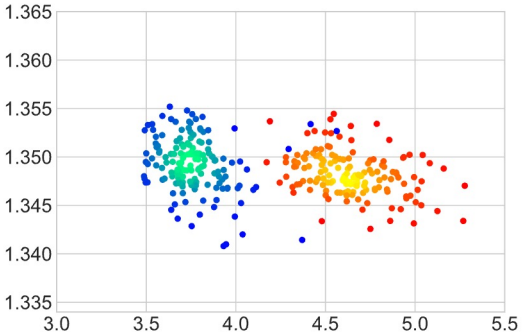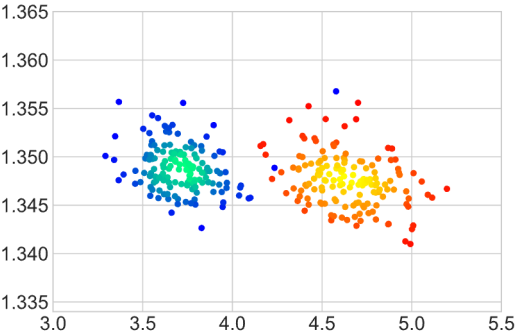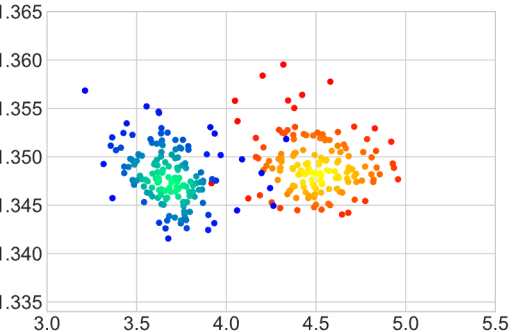

B

DM [ng]

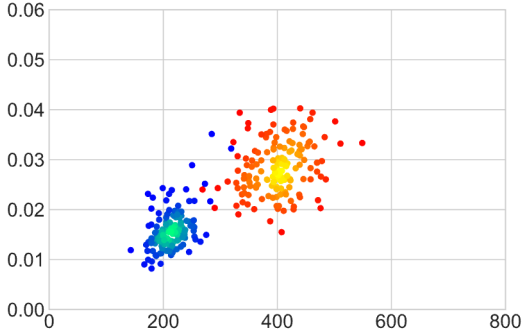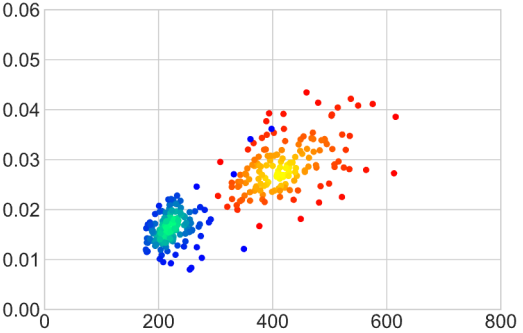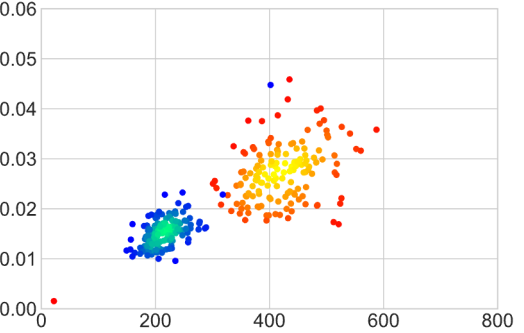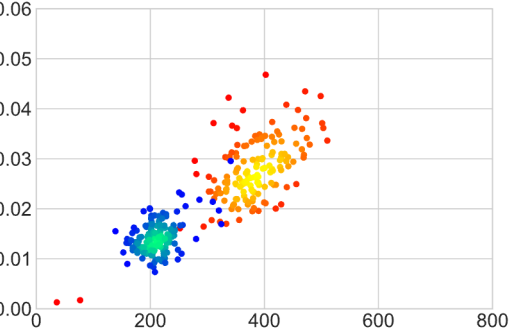

C

FF

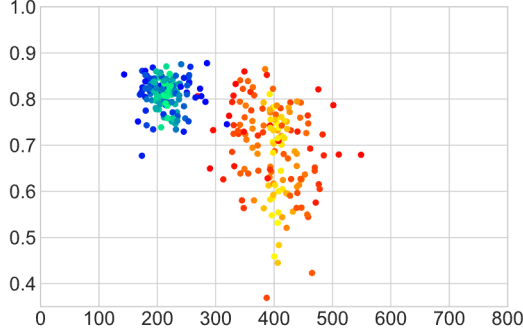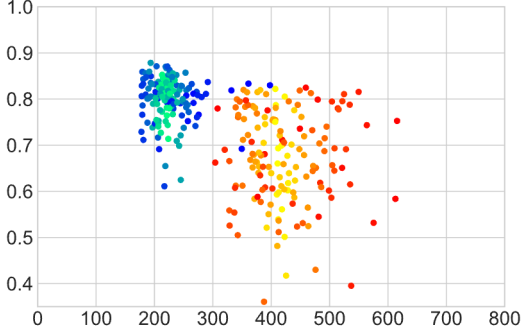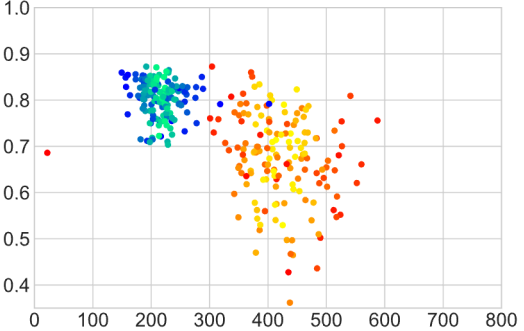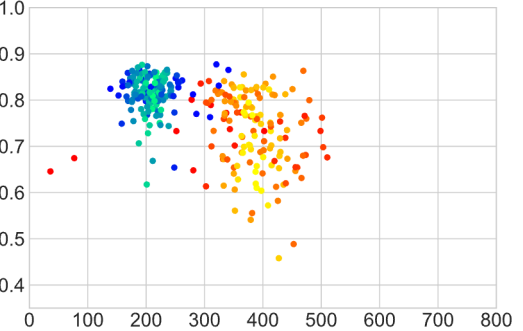

$V [\mu\text{m}^3]$

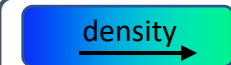

Lymphocytes

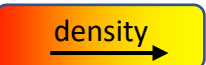

Monocytes

Pat. 13

PreOP

Day 1

Day 3

Day 6

A

$n_{\text{cell}}$

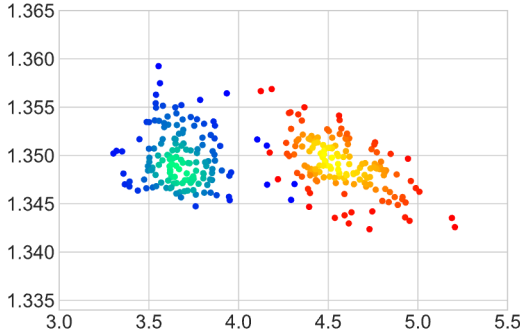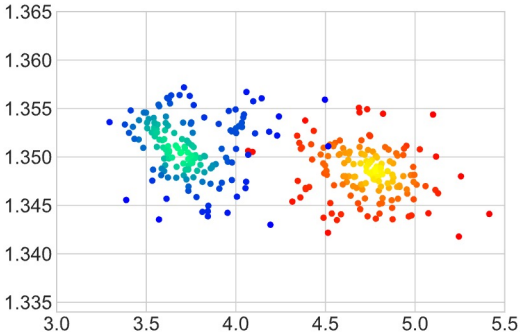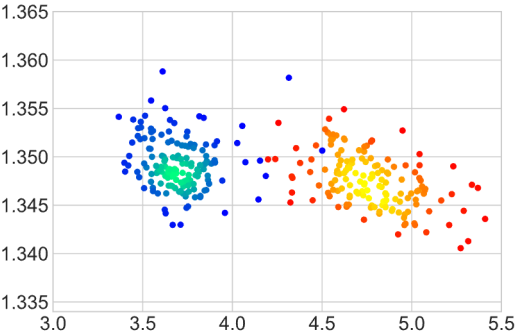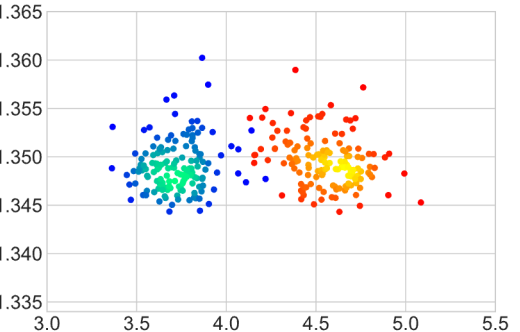

B

DM [ng]

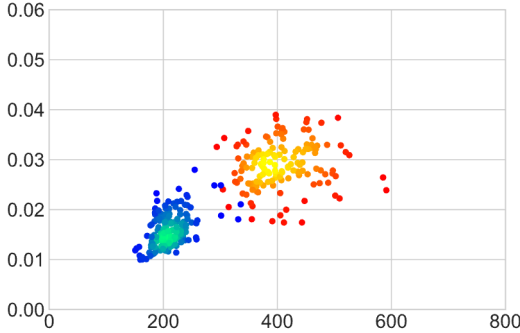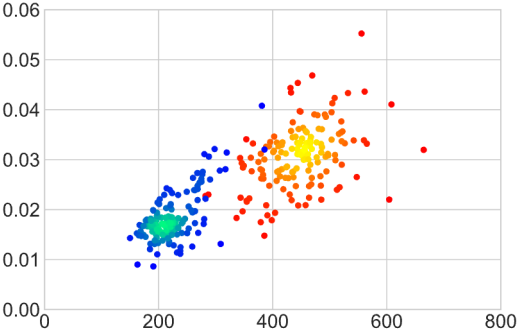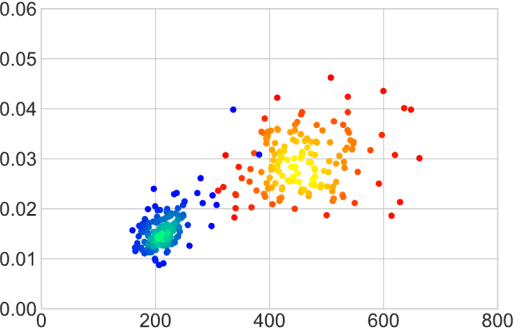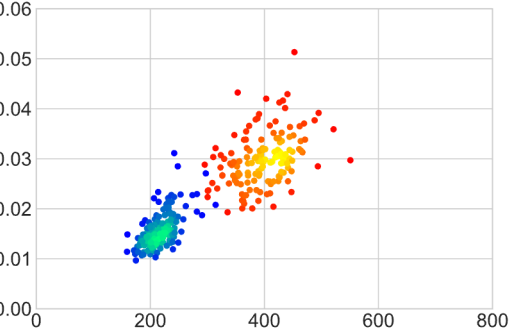

C

FF

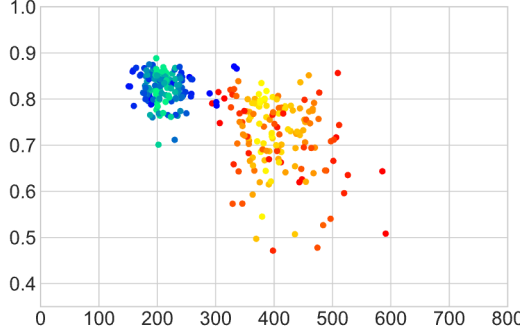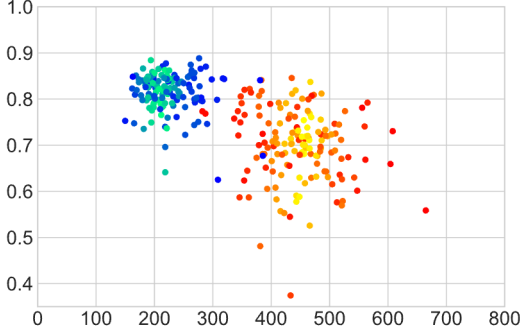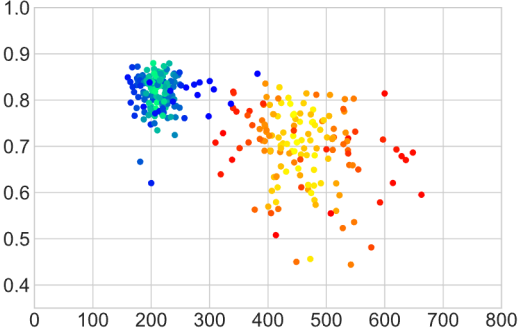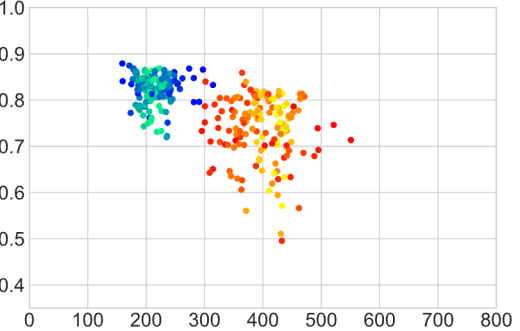

$V [\mu\text{m}^3]$



Lymphocytes



Monocytes

Pat. 14

PreOP

Day 1

Day 3

Day 6

A

$n_{\text{cell}}$

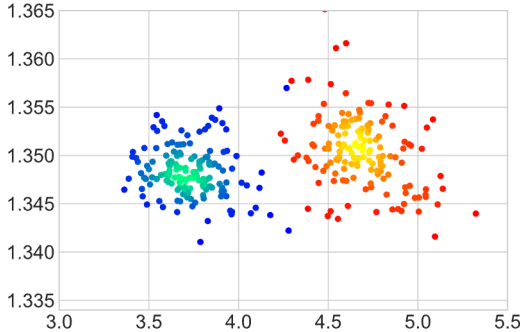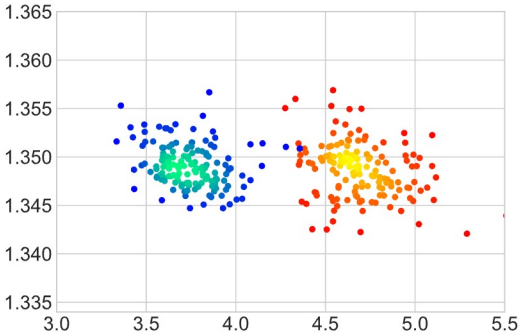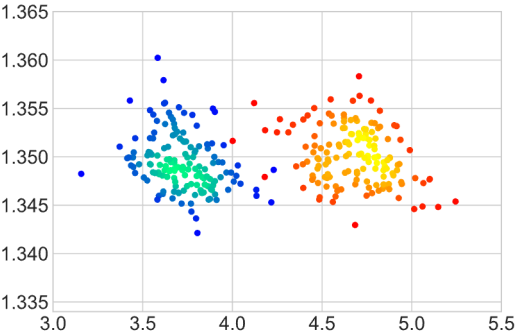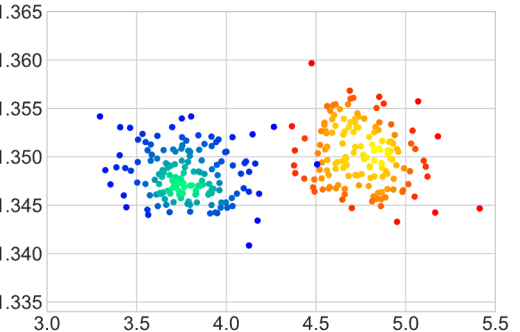

B

DM [ng]

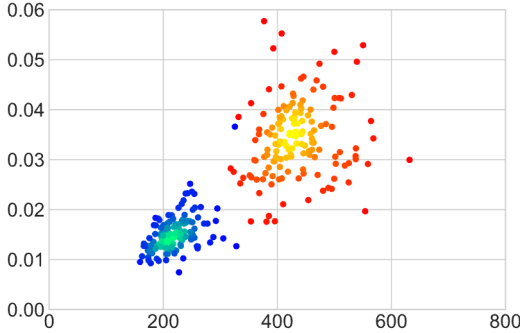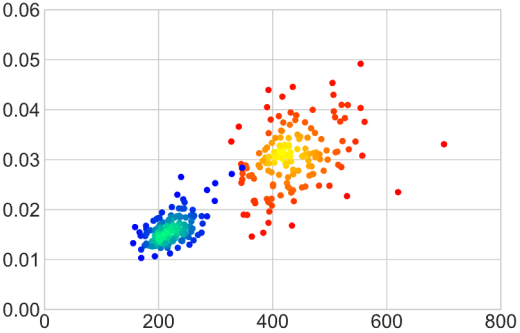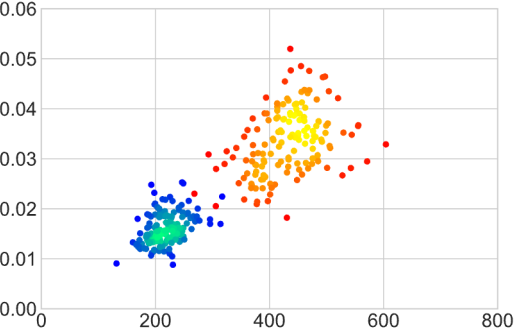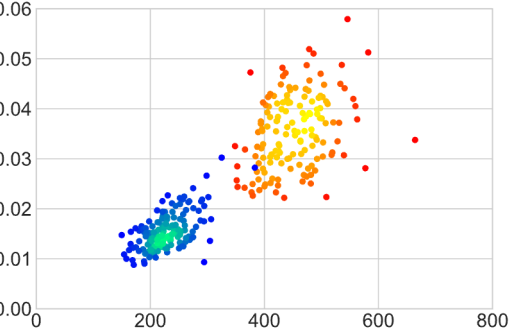

C

FF

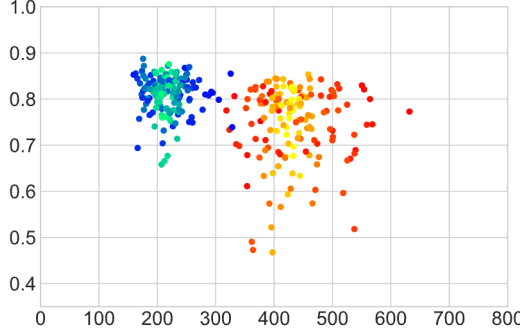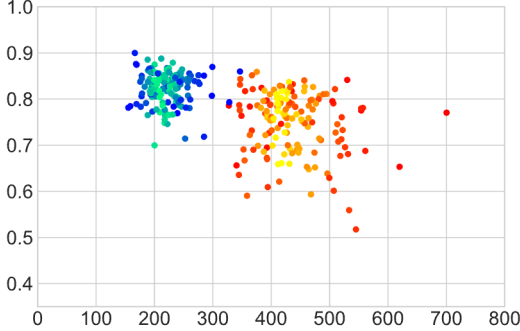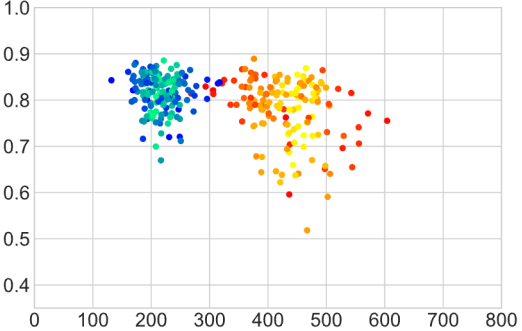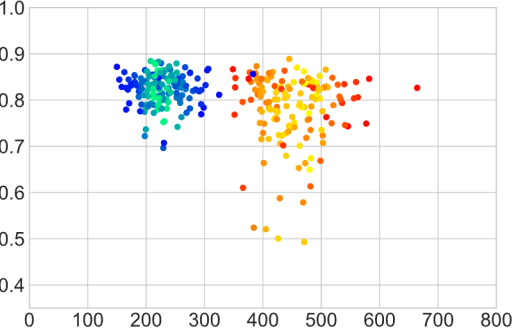

$V [\mu\text{m}^3]$



Lymphocytes



Monocytes

Pat. 15

PreOP

Day 1

Day 3

Day 6

A

$n_{\text{cell}}$

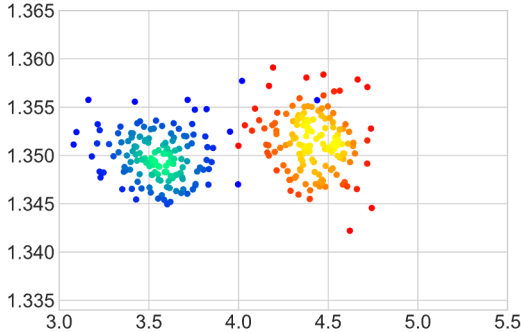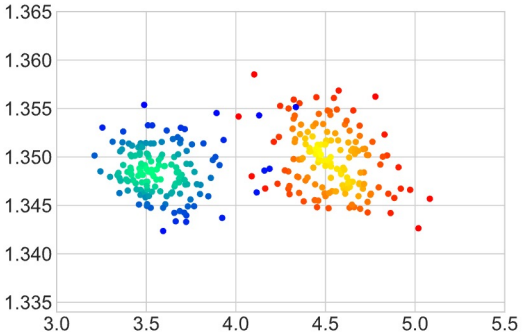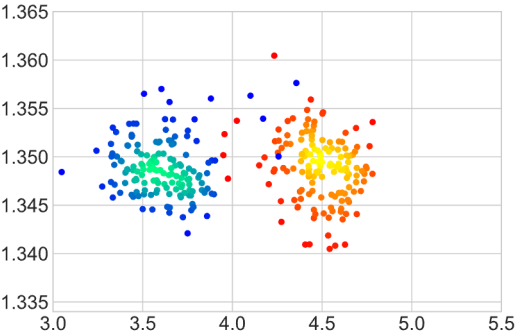

No measurement on the sixth day post-surgery due to early discharge from hospital (non-complicative course)

B

DM [ng]

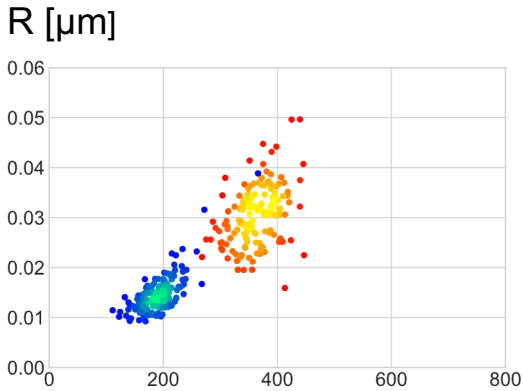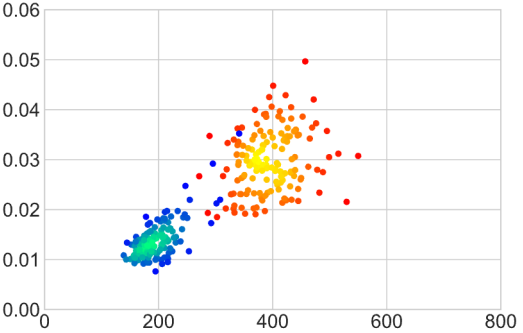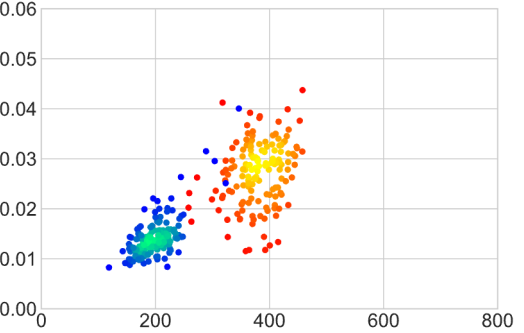

C

FF

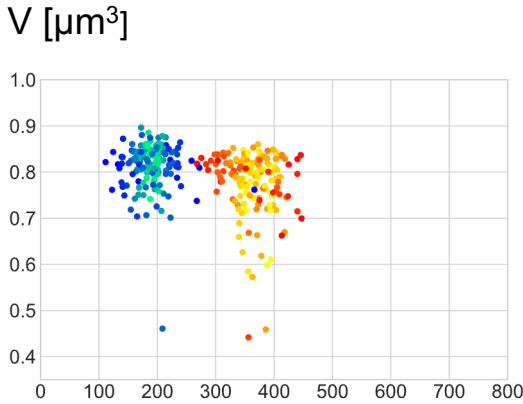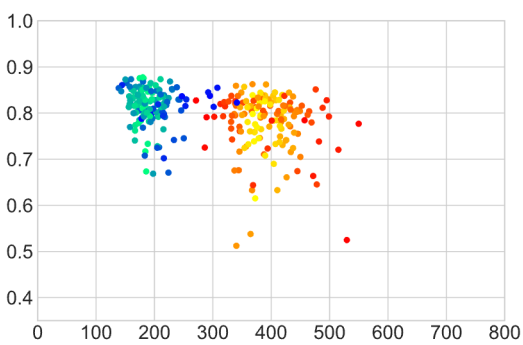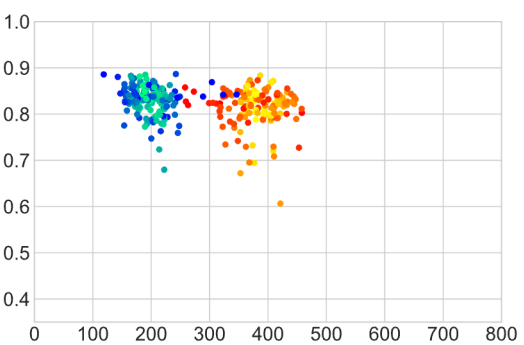

V [μm³]

density

Lymphocytes

density

Monocytes

Pat. 16

PreOP

Day 1

Day 3

Day 6

A

$n_{\text{cell}}$

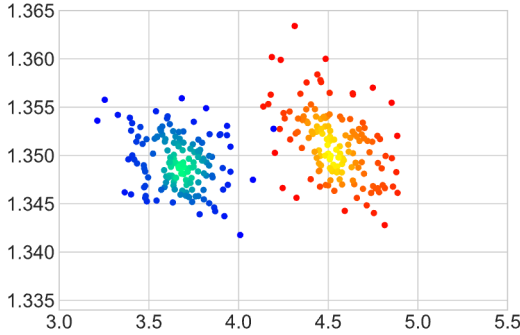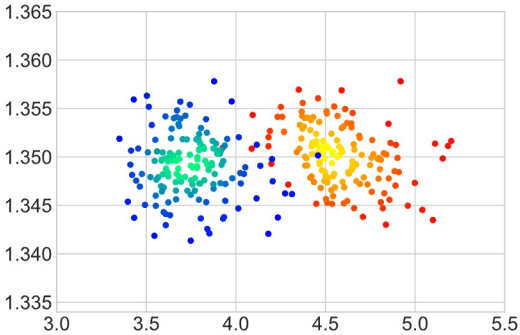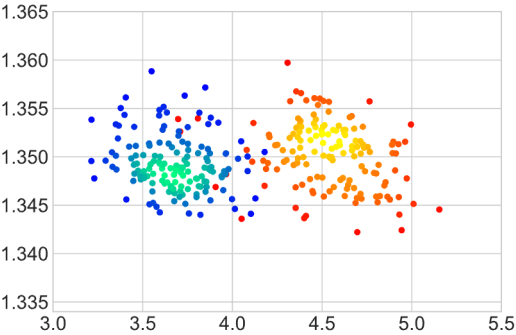

No measurement on the sixth day post-surgery due to early discharge from hospital (non-complicative course)

B

DM [ng]

$R [\mu\text{m}]$

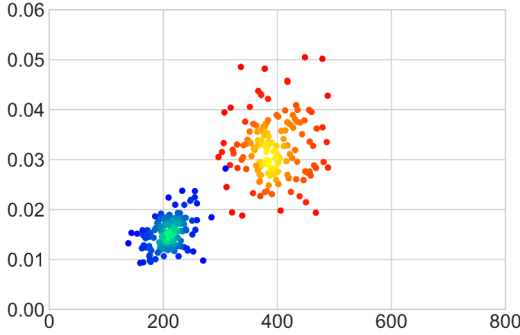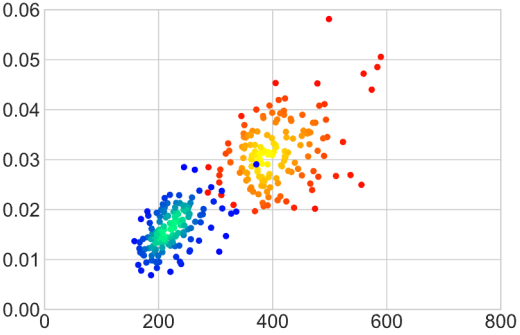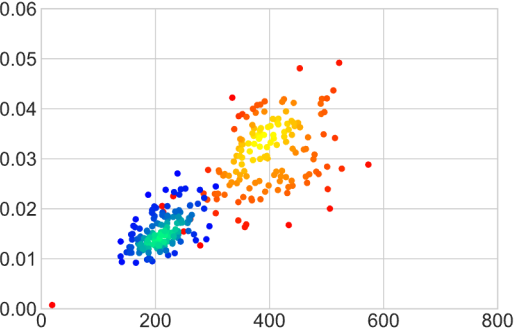

C

FF

$V [\mu\text{m}^3]$

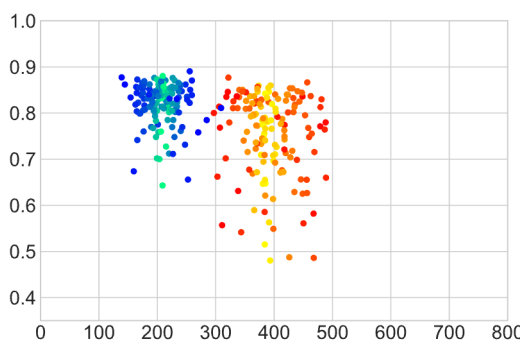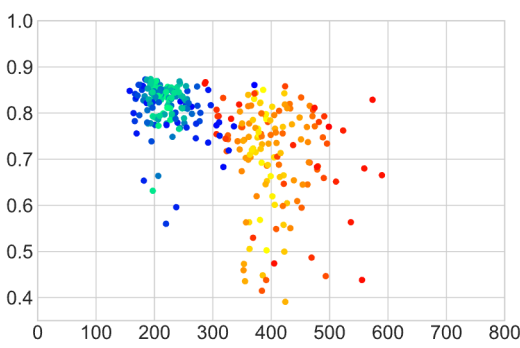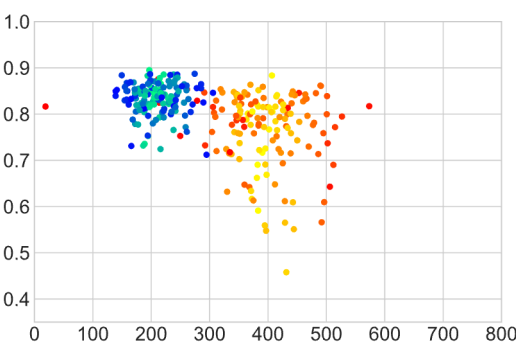

$V [\mu\text{m}^3]$

density

Lymphocytes

density

Monocytes

Pat. 17

PreOP

Day 1

Day 3

Day 6

A

$n_{\text{cell}}$

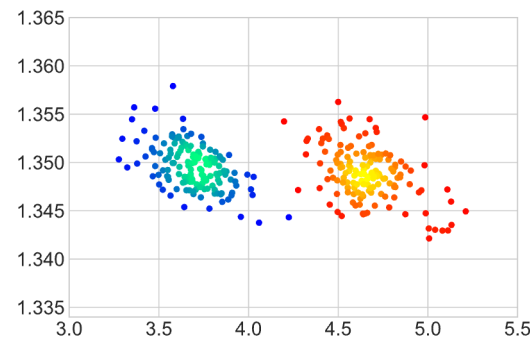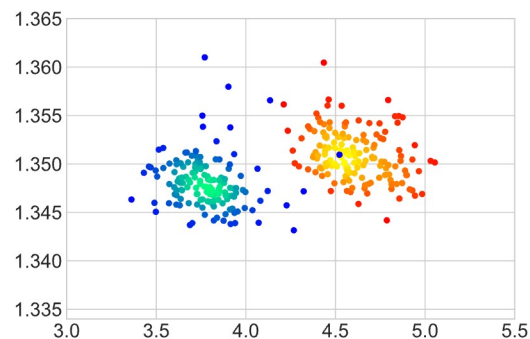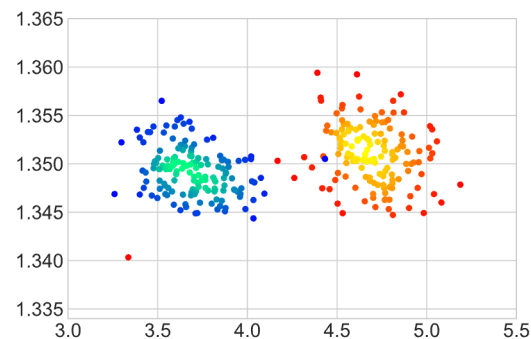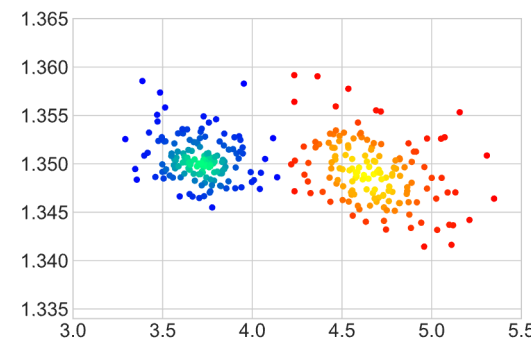

B

DM [ng]

$R [\mu\text{m}]$

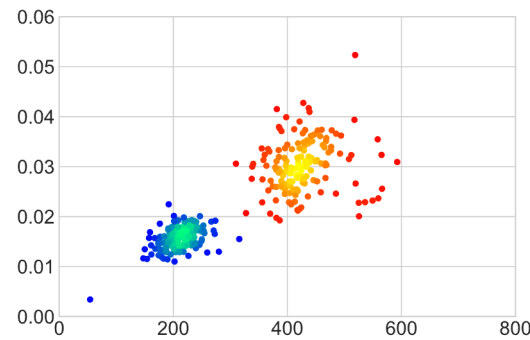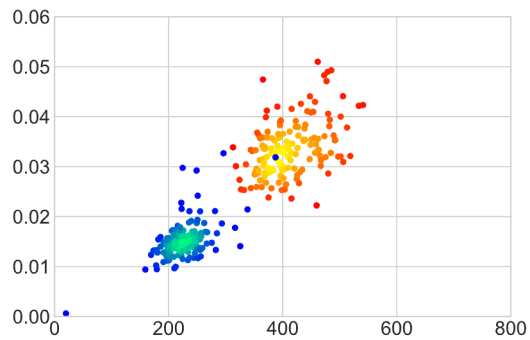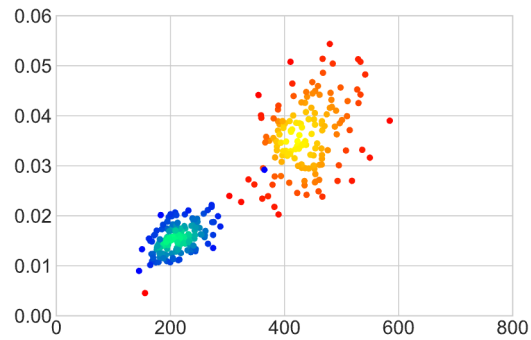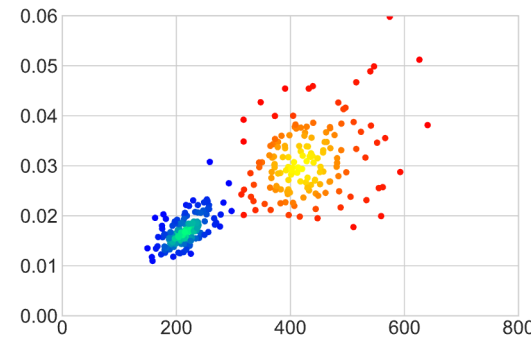

C

FF

$V [\mu\text{m}^3]$

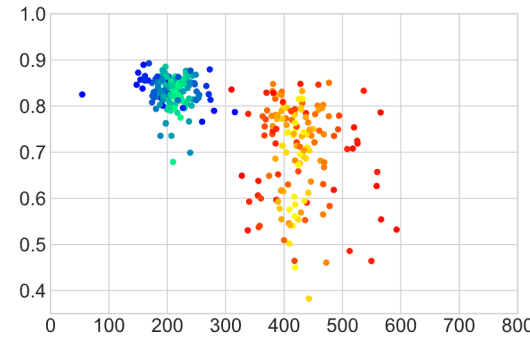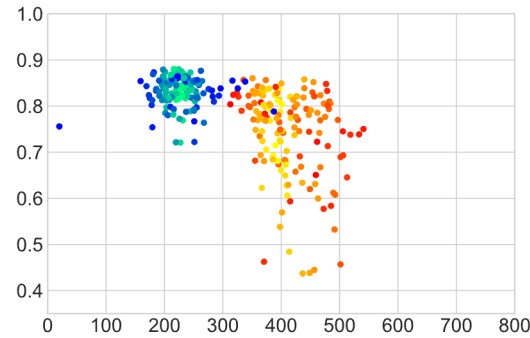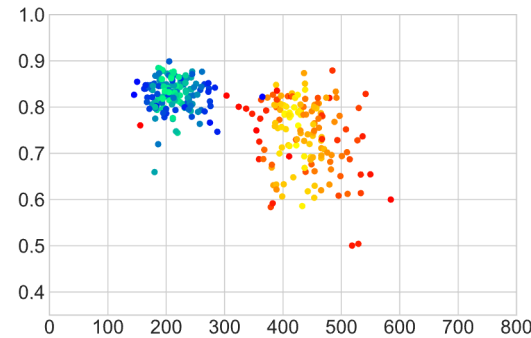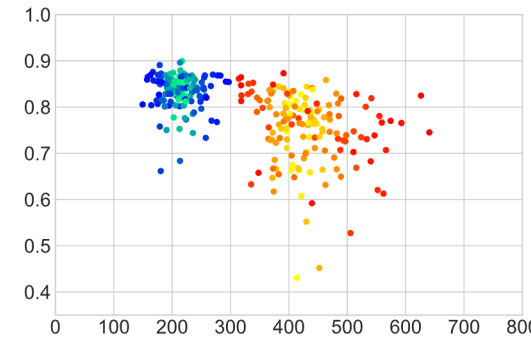

$V [\mu\text{m}^3]$

density

Lymphocytes

density

Monocytes

Pat. 18

PreOP

Day 1

Day 3

Day 6

A

$n_{\text{cell}}$

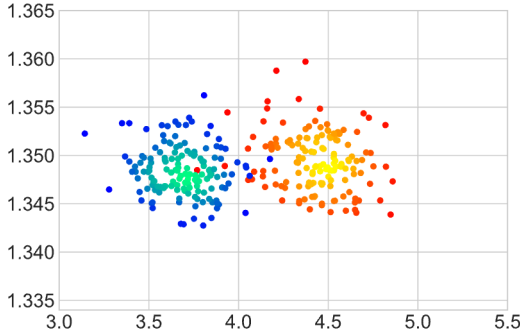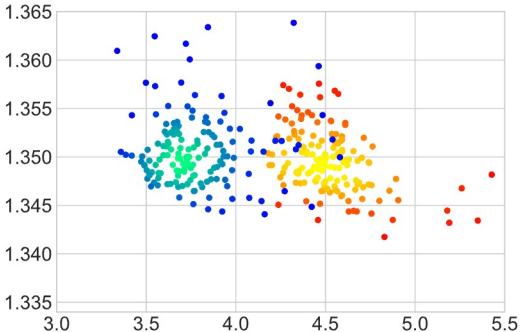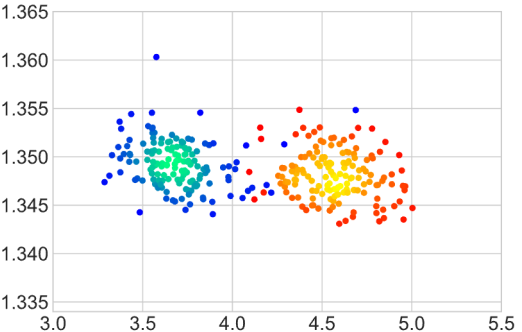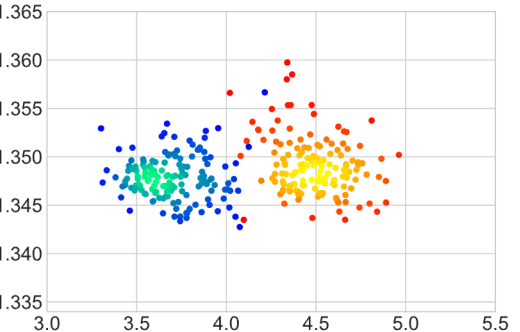

B

DM [ng]

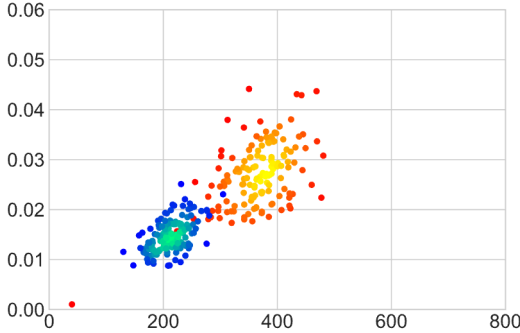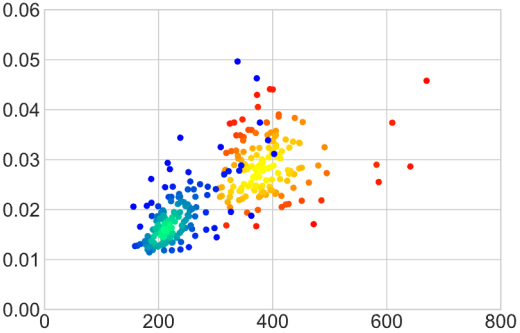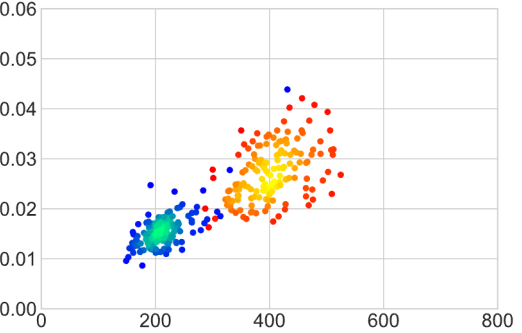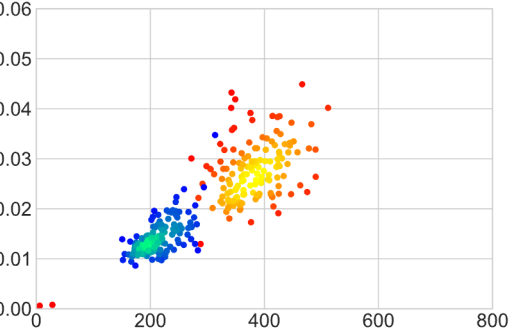

C

FF

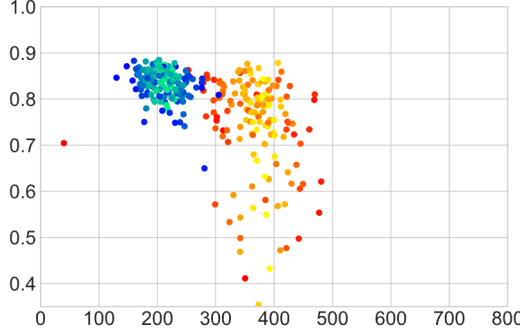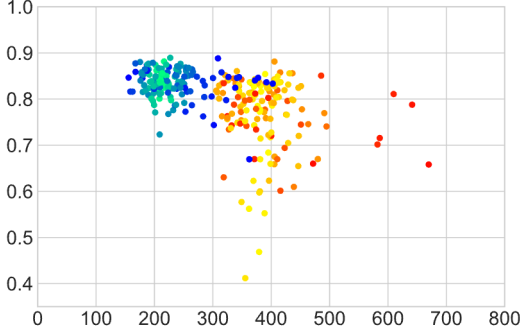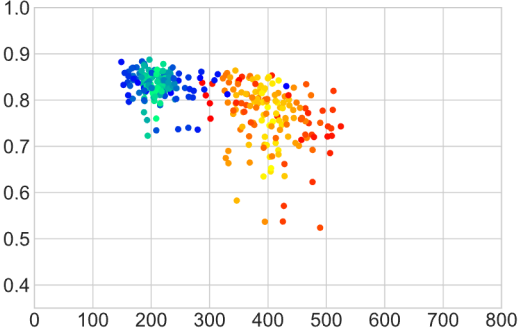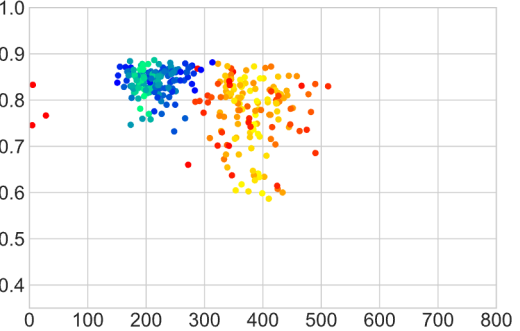

$V [\mu\text{m}^3]$

density

Lymphocytes

density

Monocytes



Pat. 19

PreOP

Day 1

Day 3

Day 6

A

$n_{\text{cell}}$

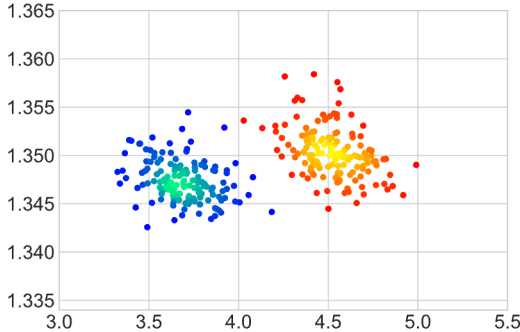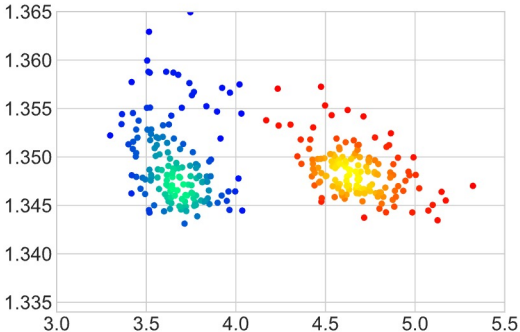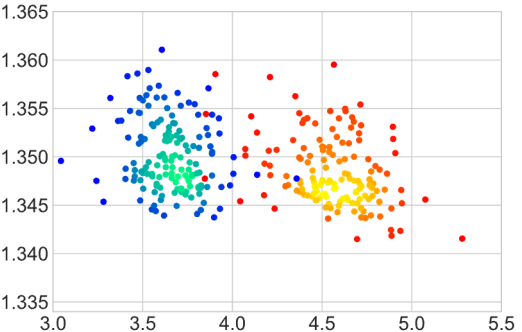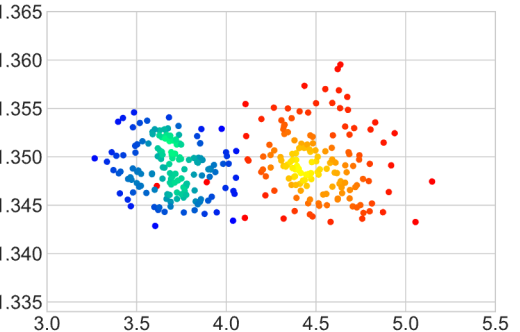

B

DM [ng]

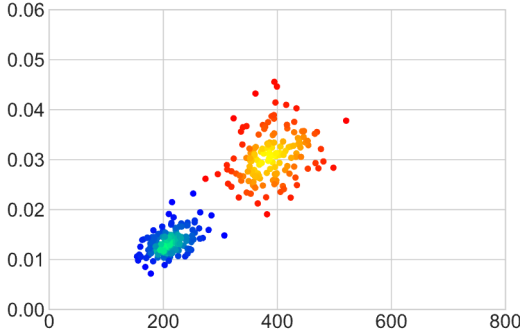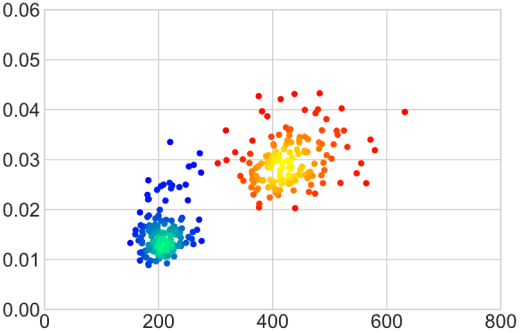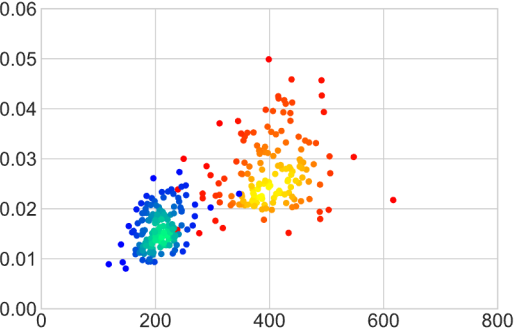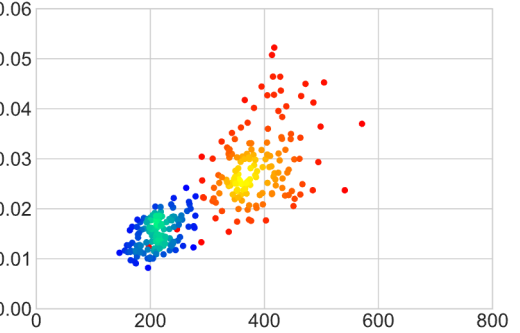

C

FF

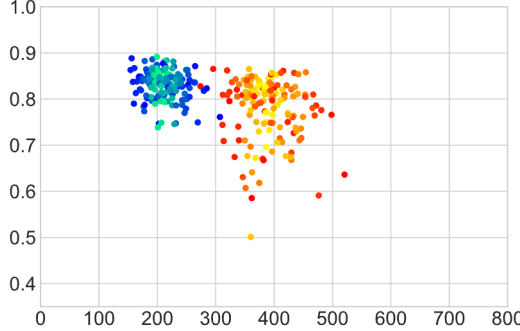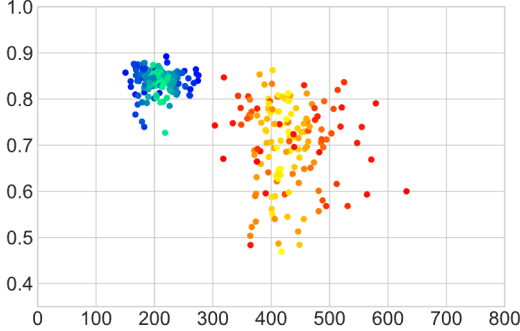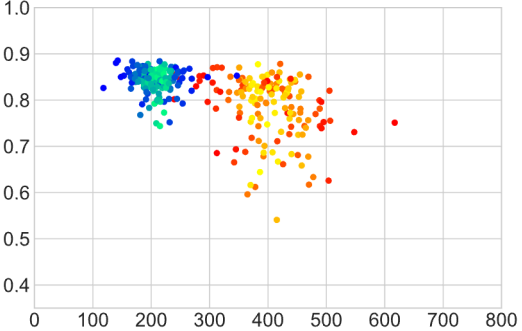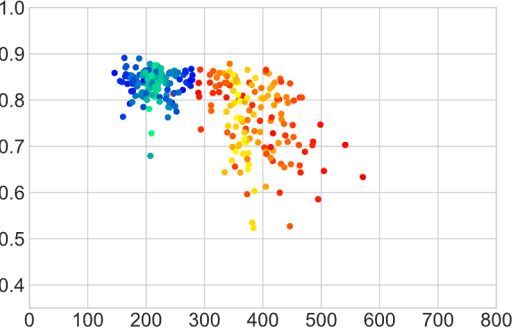

$V [\mu\text{m}^3]$

density

Lymphocytes

density

Monocytes



Pat. 20

PreOP

Day 1

Day 3

Day 6

A

$n_{\text{cell}}$

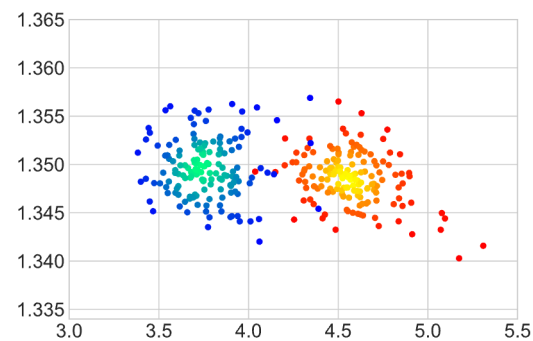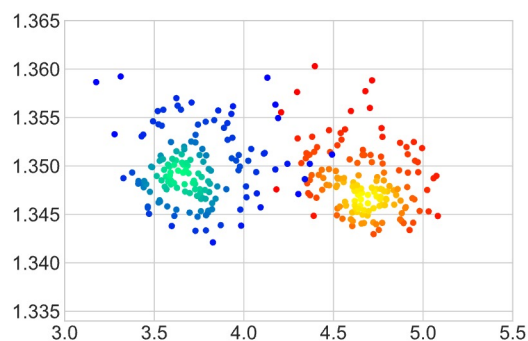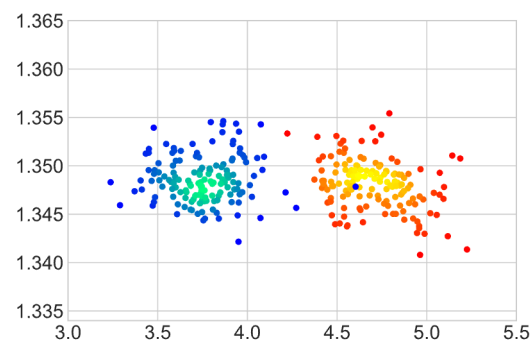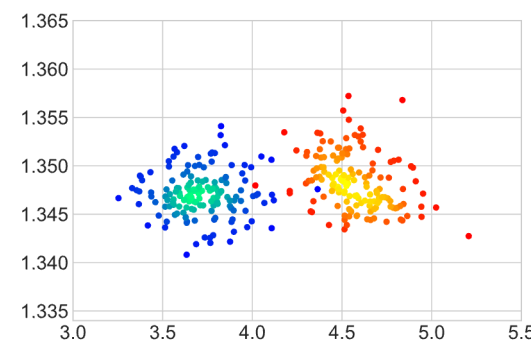

B

DM [ng]

R [ $\mu\text{m}$ ]

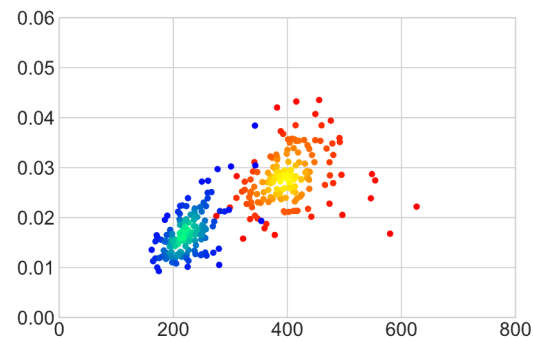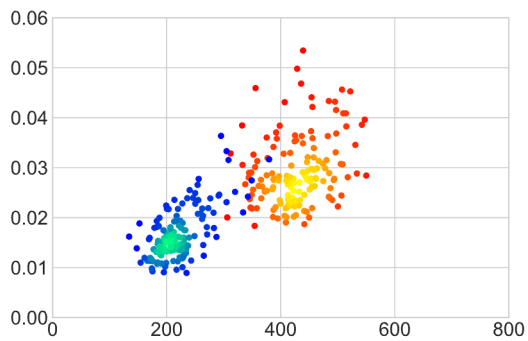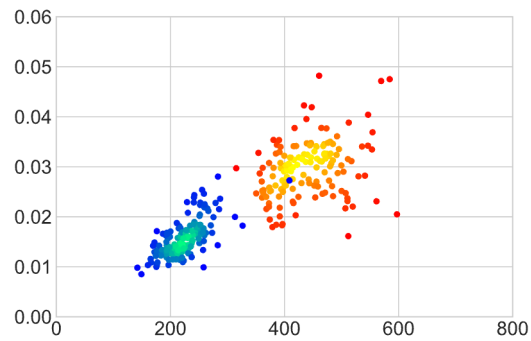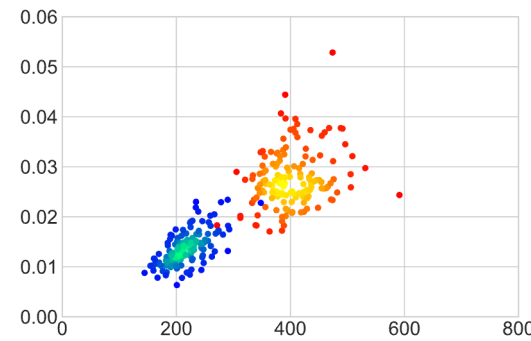

C

FF

V [ $\mu\text{m}^3$ ]

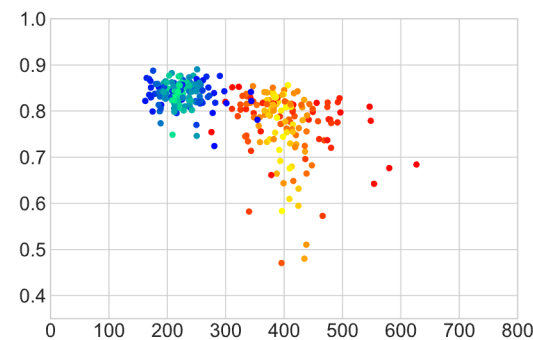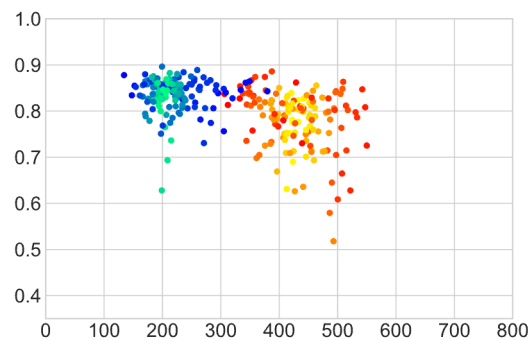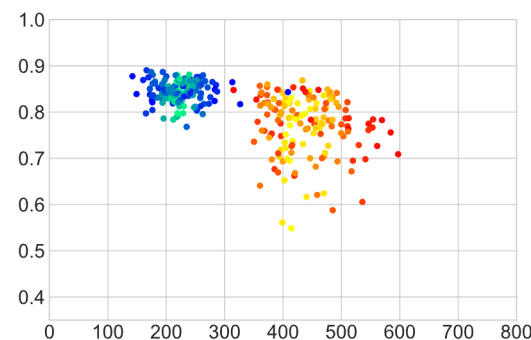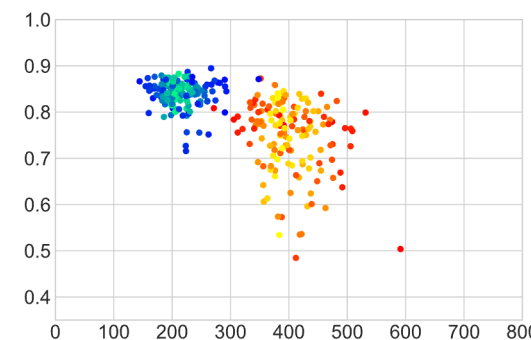

V [ $\mu\text{m}^3$ ]

density

Lymphocytes

density

Monocytes

Pat. 21

PreOP

Day 1

Day 3

Day 6

A

$n_{\text{cell}}$

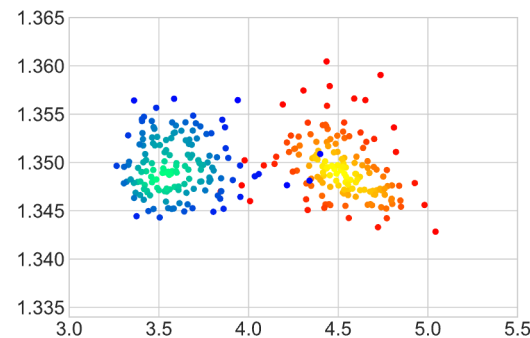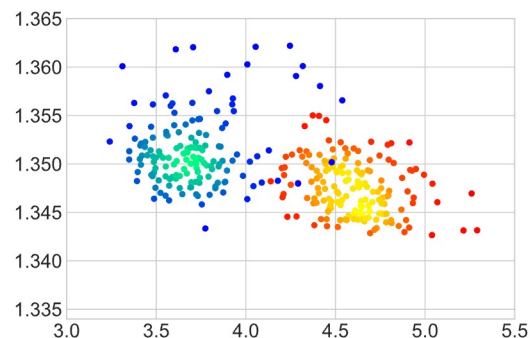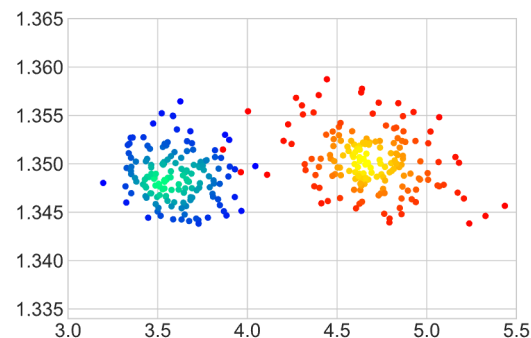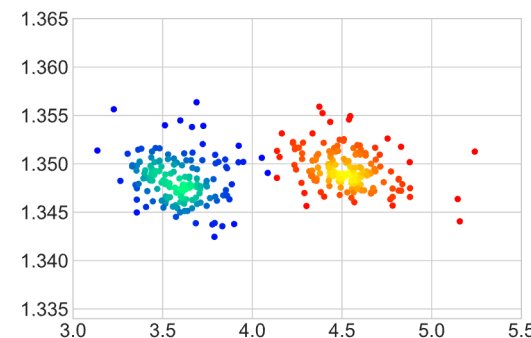

B

DM [ng]

$R [\mu\text{m}]$

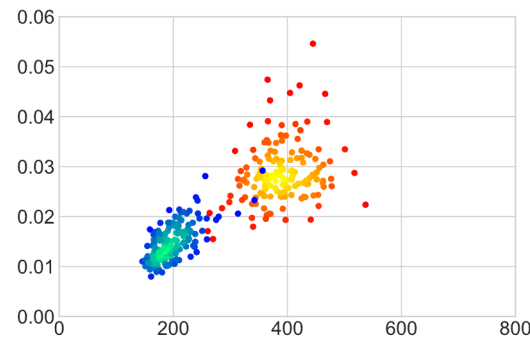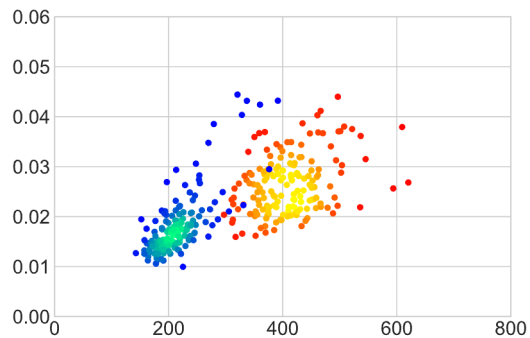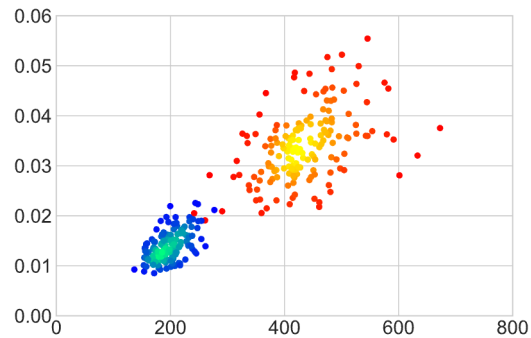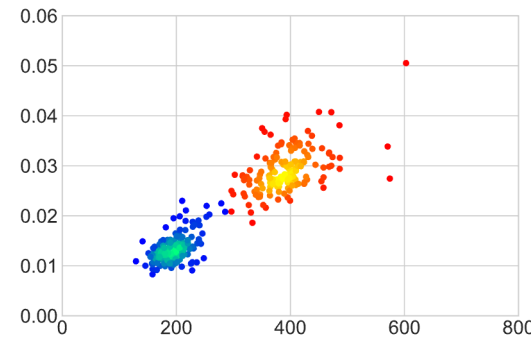

C

FF

$V [\mu\text{m}^3]$

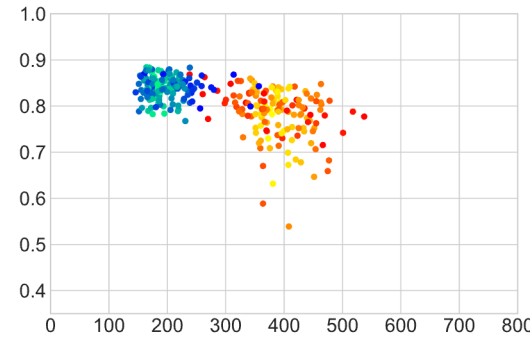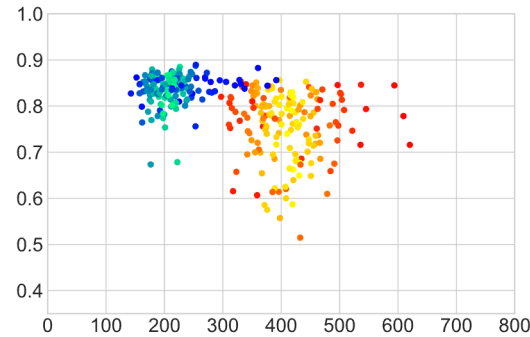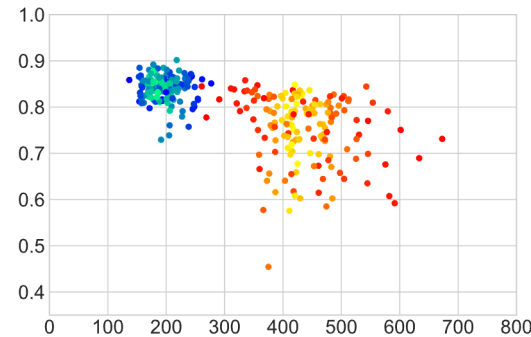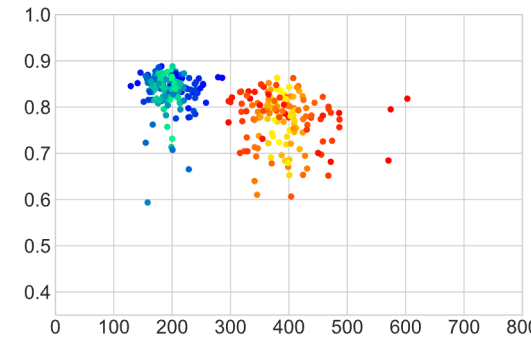

$V [\mu\text{m}^3]$

density

Lymphocytes

density

Monocytes

Pat. 22

PreOP

Day 1

Day 3

Day 6

A

$n_{\text{cell}}$

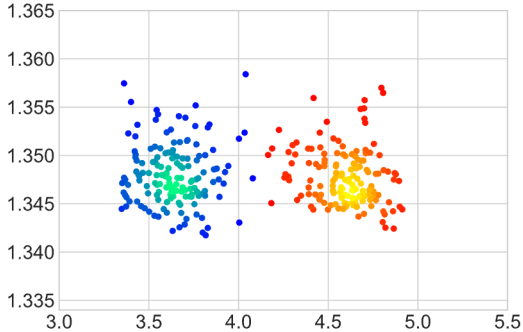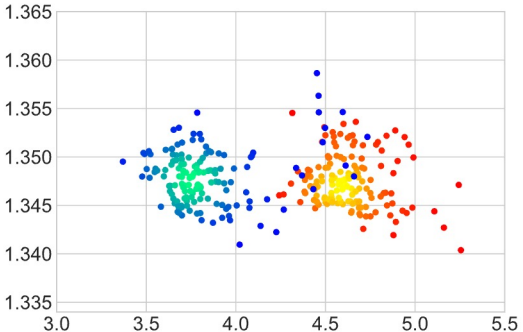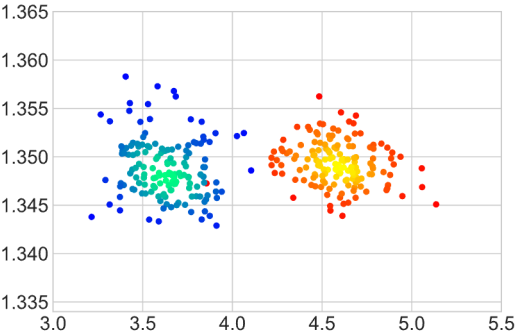

No measurement on the sixth day post-surgery due to early discharge from hospital (non-complicative course)

B

DM [ng]

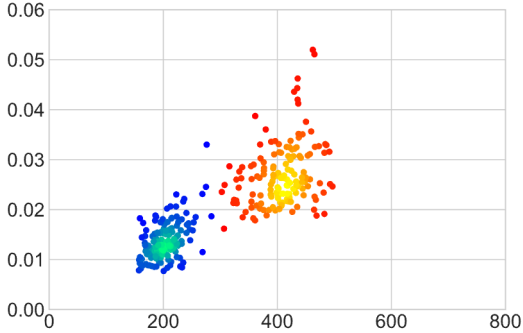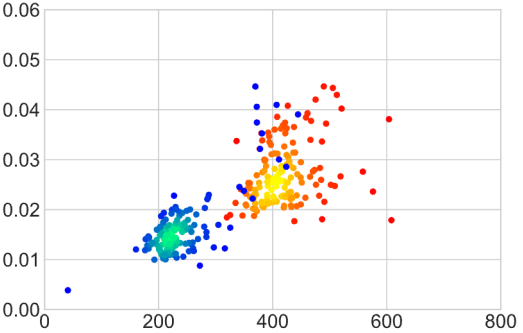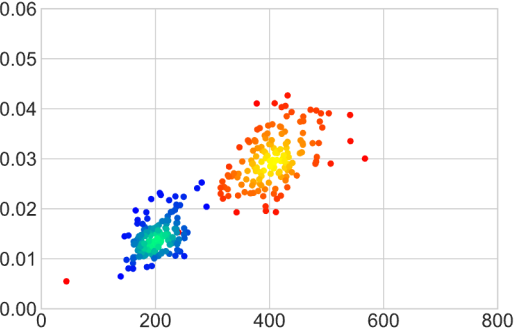

C

FF

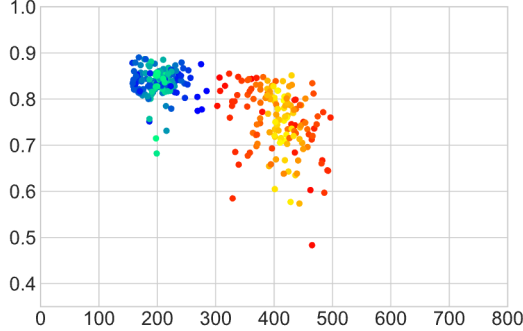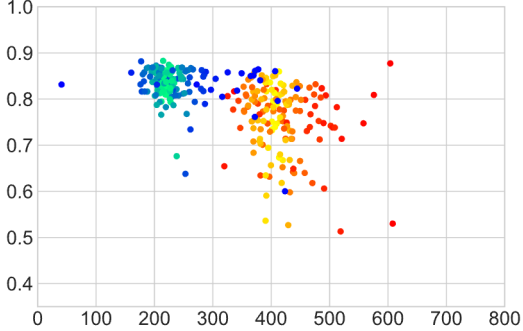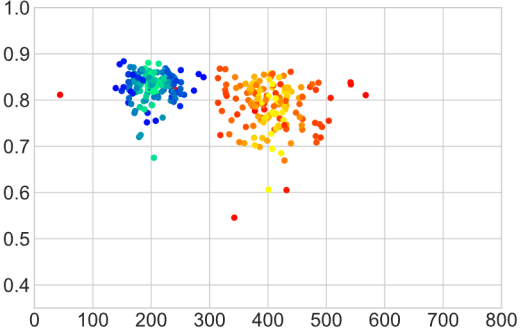

$V [\mu\text{m}^3]$

density

Lymphocytes

density

Monocytes

Pat. 23

PreOP

Day 1

Day 3

Day 6

A

$n_{\text{cell}}$

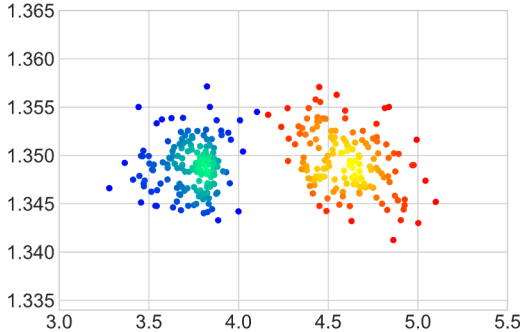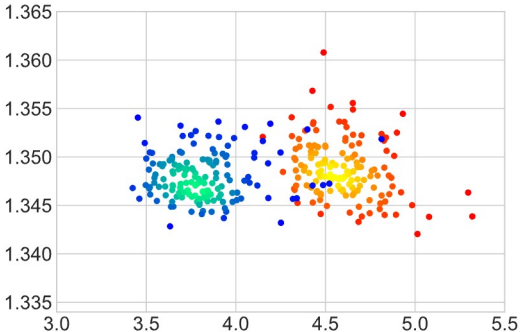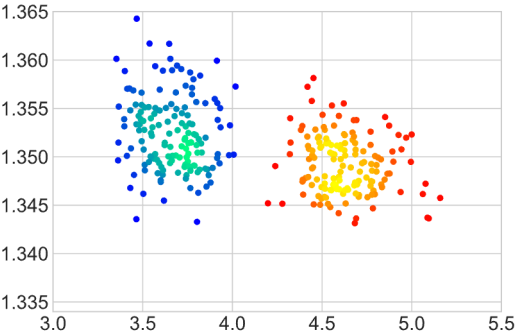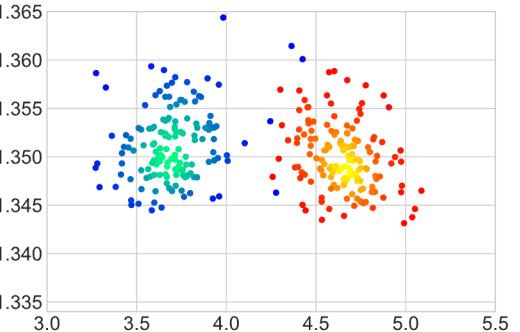

B

DM [ng]

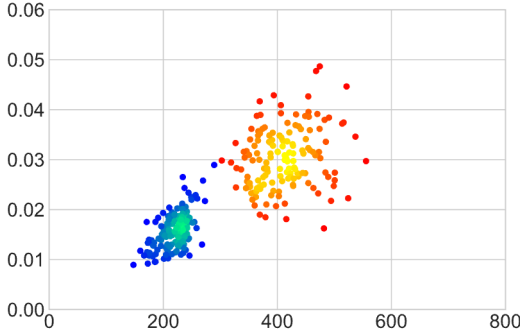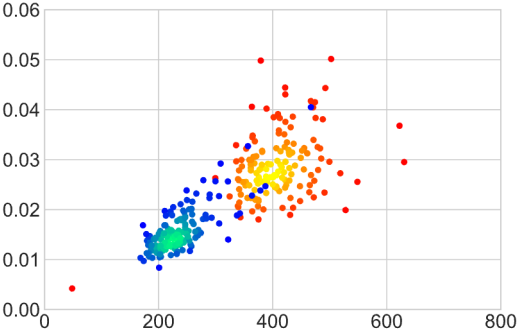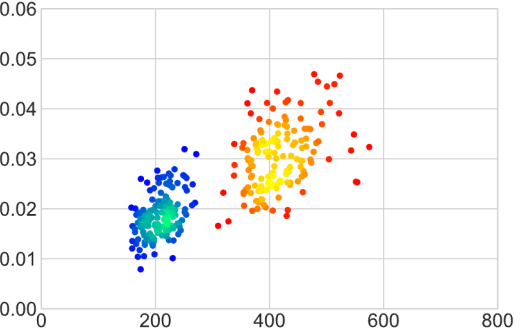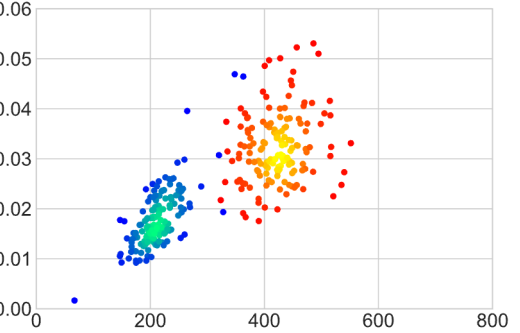

C

FF

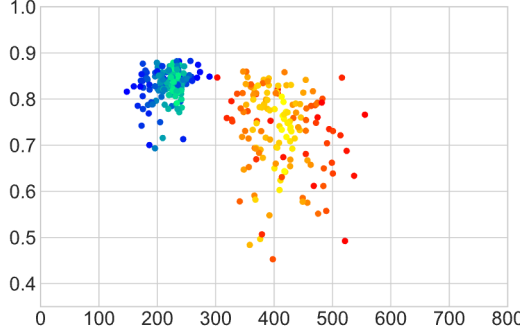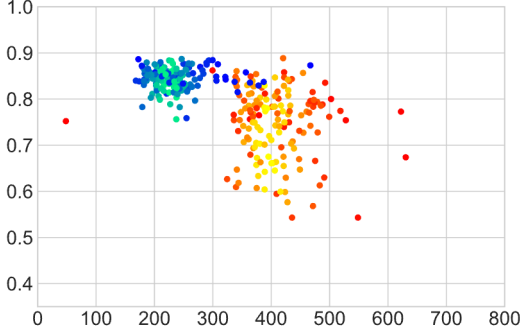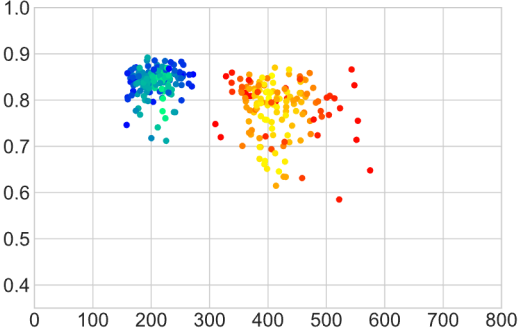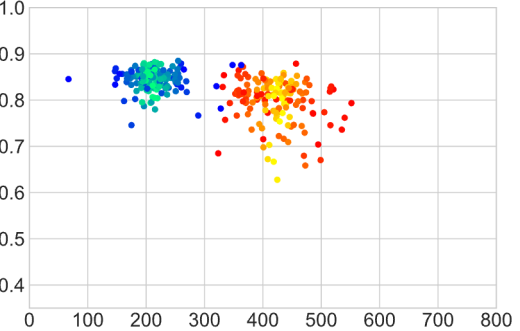

$V [\mu\text{m}^3]$



Lymphocytes



Monocytes

Pat. 24

PreOP

Day 1

Day 3

Day 6

A

$n_{\text{cell}}$

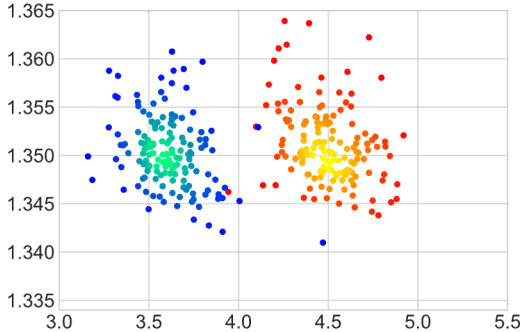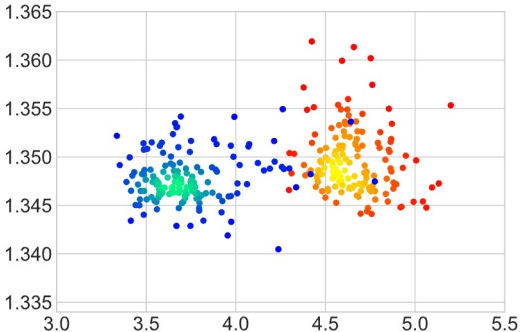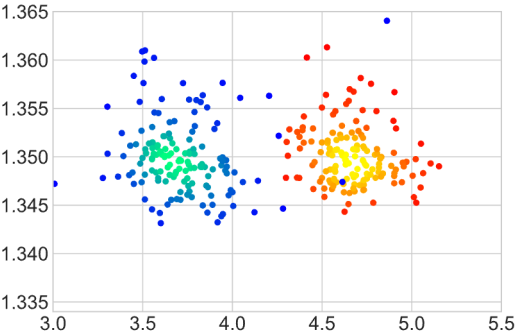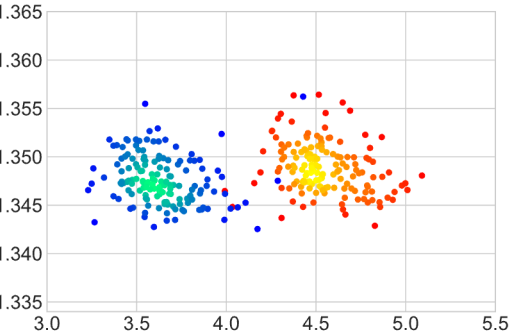

B

DM [ng]

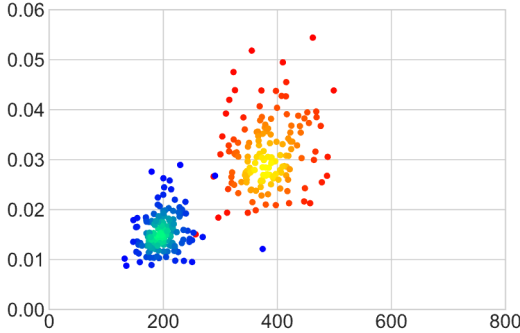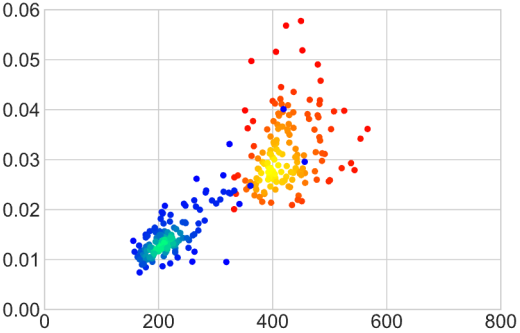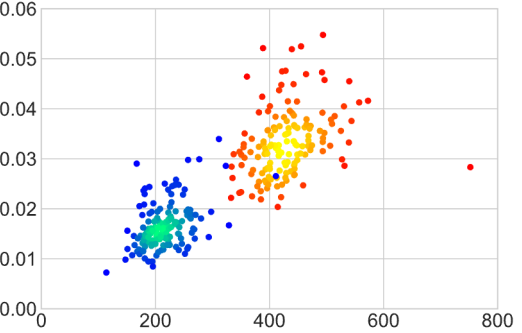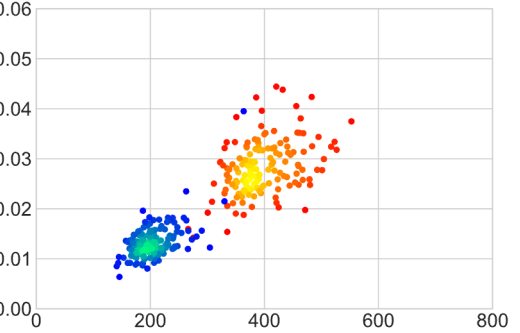

C

FF

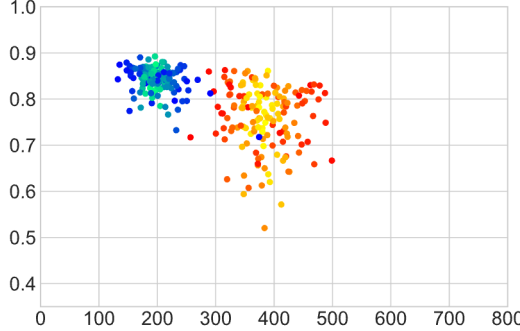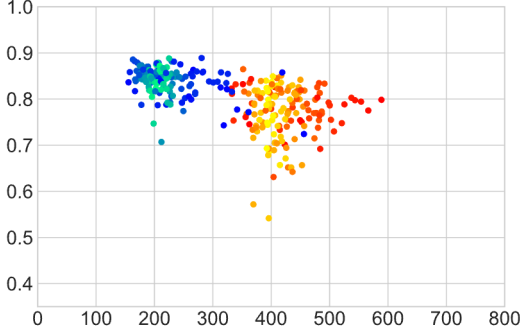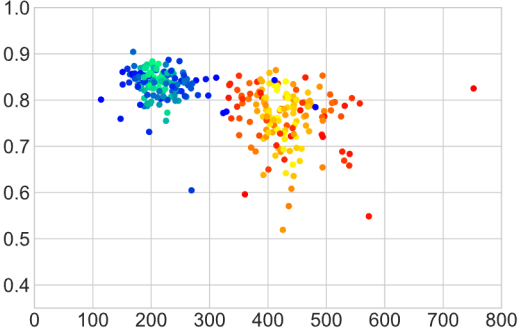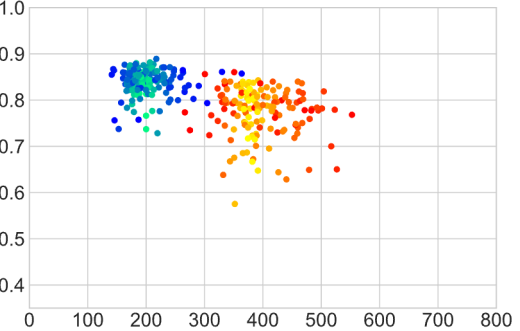

$V [\mu\text{m}^3]$



Lymphocytes



Monocytes

Pat. 25

PreOP

Day 1

Day 3

Day 6

A

$n_{cell}$

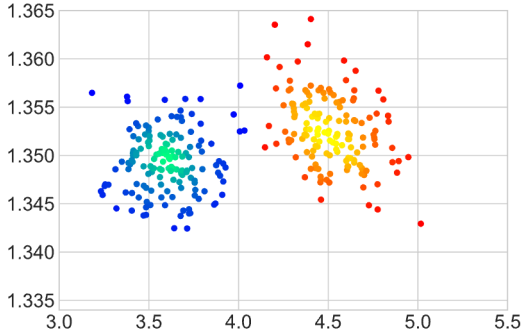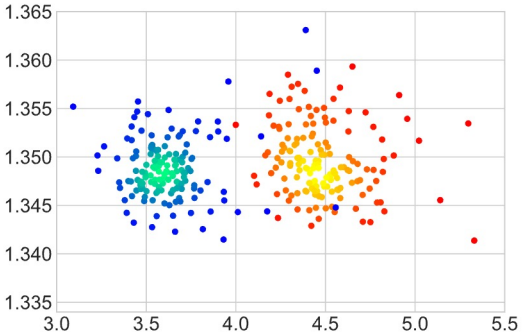

No further measurements  
due to patient's death one  
day post-surgery

B

DM [ng]

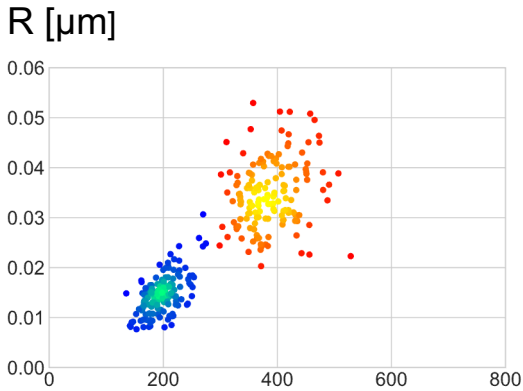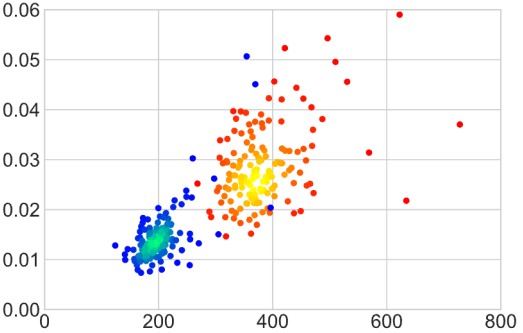

C

FF

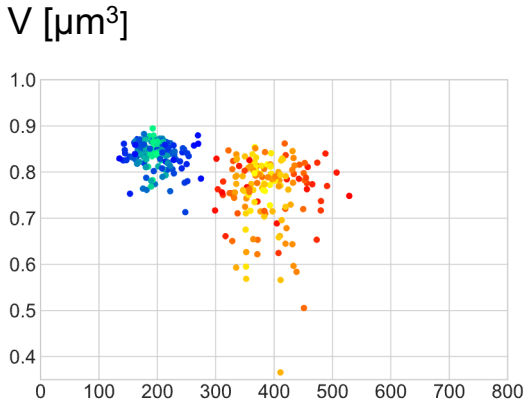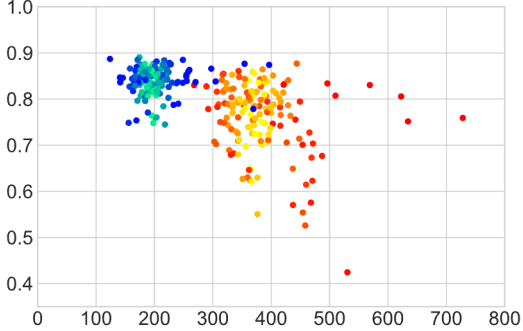

$V [\mu m^3]$

density

Lymphocytes

density

Monocytes
